# Supplementary material for: A Lewis acid β-diiminato-zinc-complex as all-rounder for co- and terpolymerisation of various epoxides with carbon dioxide
Source: PubMed Central journal article supplement — Chem Sci. 2016 Nov 17;8(3):1876–82. doi: 10.1039/c6sc04477h (PMC5444112; doi:10.1039/c6sc04477h), 2016-11-17
Supplement: SC-008-C6SC04477H-s001.pdf [file SC-008-C6SC04477H-s001.pdf]

# Supporting Information - A Lewis acid $\beta$ -Diiminato-Zinc-Complex as All-Rounder for Co- and Terpolymerization of various Epoxides with Carbon Dioxide

M. Reiter<sup>a</sup>, S. Vagin<sup>a</sup>, A. Kronast<sup>a</sup>, C. Jandl<sup>b</sup> and B. Rieger<sup>\*a</sup>

## Table of content

|                                                                                                       |    |
|-------------------------------------------------------------------------------------------------------|----|
| 0. Experimental Section.....                                                                          | 2  |
| 1. Pressurizing Catalyst (1) with CO <sub>2</sub> .....                                               | 3  |
| 2. GPC results of Table 1 and Table 3. ....                                                           | 4  |
| 3. Ring Opening Polymerizations of CHO, PO, LO with catalyst 1-3 (Table 3). ....                      | 8  |
| 4. Calibration curve for <i>in situ</i> determination of the TOF .....                                | 9  |
| 5. <i>In situ</i> IR spectra for Copolymerization results of CO <sub>2</sub> and Limonene oxide. .... | 10 |
| 6. DSC Analysis of the terpolymers.....                                                               | 11 |
| 7. UV-Vis Analysis of the terpolymers .....                                                           | 12 |
| 8. Synthesis and analysis (GPC, NMR) of Poly(menthene carbonate) .....                                | 12 |
| 9. <sup>1</sup> H and <sup>13</sup> C NMR spectra of selected precipitated polymer samples .....      | 15 |
| 10. Single Crystal X-Ray Determination .....                                                          | 36 |

## 0. Experimental Section

**General.** All reactions containing air- and/or moisture sensitive compounds were performed under dry argon using standard Schlenk or glovebox techniques. All chemicals were purchased from Aldrich or ABCR. Solvents were obtained from an MBraun MB-SPS-800 solvent purification system. Monomers were dried over calcium hydride and distilled prior to polymerization. NMR spectra were recorded on a Bruker AVIII-300 and AVIII 500 Cryo spectrometer.  $^1\text{H}$  NMR spectroscopic chemical shifts  $\delta$  are reported in ppm relative to tetramethylsilane and calibrated to the residual proton signal of the deuterated solvent. Deuterated solvents were obtained from Sigma Aldrich and dried over 3 Å molecular sieves. ESI-MS analytical measurements were performed in acetonitrile solutions on a Varian 500 MS spectrometer. Gel permeation chromatography (GPC) analysis was performed on a Varian PL-GPC 50. As eluent, chloroform (HPLC grade) with  $1.5 \text{ g L}^{-1}$  tetrabutylammonium tetrafluoroborate was used. Polystyrene standards were used for calibration. Furthermore, gel permeation chromatography (GPC) analysis was performed on a Varian PL-GPC 50 Plus at 35 °C equipped with a PLgel-Mixed-C column set (600 mm). THF (HPLC grade) was used as solvent together with 2,6-di-tert-butyl-4-methylphenol at a flow rate of 1 mL/min and a polystyrene standard. DSC measurements were performed at a DSC Q2000 of TA Instruments with a heating rate of 5°C/min. UV-Vis spectra were recorded on a Varian Cary-50. *In situ* IR measurements were carried out under an argon atmosphere using an ATR IR MettlerToledo system. Elemental analysis was performed at the microanalytical laboratory of the Department of Inorganic Chemistry at the Technical University of Munich.

**Monomer Synthesis.** 84% *trans*-(+)-Limonene oxide was synthesized according to a literature procedure.<sup>1</sup> >99% *trans*-(+)-Limonene oxide was synthesized according to literature procedure, but purification was performed via silica gel chromatography ( $\text{SiO}_2$ , Hexane:EtOAc, 20:1;  $R_f=0.41$ ).<sup>2</sup> Menthene oxide was prepared according to modified literature procedure (thf was used instead of MeOH).<sup>3</sup>

**Ligand Synthesis.**  $\text{CH}(\text{CCF}_3\text{NC}_6\text{H}_4\text{-}2,6\text{C}_2\text{H}_5)_2$ , ligand (**I**) was synthesized according to literature procedures.<sup>4,5</sup>

### Complex Synthesis.

$[\text{CH}(\text{CCF}_3\text{NC}_6\text{H}_4\text{-}2,6\text{C}_2\text{H}_5)_2\text{ZnN}(\text{SiMe}_3)_2]$ , **Complex 1**. 1.00 equiv of ligand **I** and 1.20 equiv of  $\text{Zn}(\text{NTMS}_2)_2$  were dissolved in dry toluene and stirred at 110 °C under inert atmosphere for 3 days. After cooling to room temperature, the solvent was removed under vacuum and the yellow solid was twice recrystallized from toluene at -35 °C to yield yellow crystals (42%). Anal. Calcd for  $\text{C}_{31}\text{H}_{45}\text{F}_6\text{N}_3\text{Si}_2\text{Zn}$ : C, 53.55; H, 6.52; N, 6.04. Found: C, 53.22; H, 6.23; N, 5.86.  $^1\text{H}$  NMR (500 MHz,  $\text{C}_6\text{D}_6$ , 298 K):  $\delta$ (ppm) = 7.12 – 7.02 (m, 6H,  $H_{\text{Aromat}}$ ), 6.11 (s, 1H, CH), 2.73-2.58 (m, 8H,  $\text{CH}_2$ ), 1.21 (t,  $J^3 = 7.5 \text{ Hz}$ , 12H,  $\text{CH}_3$ ), -0.13 (s, 18H,  $\text{SiCH}_3$ ).  $^{13}\text{C}$  NMR (126 MHz,  $\text{C}_6\text{D}_6$ , 298K):  $\delta$ (ppm) = 157.88 (q,  $^2J_{\text{CF}} = 27.3 \text{ Hz}$ ,  $\text{NC}(\text{CF}_3)\text{CHC}(\text{CF}_3)\text{N}$ ), 143.16 (s,  $\text{C}_{\text{Ar}}$ ), 136.19 (s,  $\text{C}_{\text{Ar}}$ ), 127.10 (s,  $\text{C}_{\text{Ar}}$ ), 125.40 (s,  $\text{C}_{\text{Ar}}$ ), 120.24 (q,  $^1J_{\text{CF}} = 287 \text{ Hz}$ ,  $\text{NC}(\text{CF}_3)\text{CHC}(\text{CF}_3)\text{N}$ ), 87.09 (m,  $\text{NC}(\text{CF}_3)\text{CHC}(\text{CF}_3)\text{N}$ ), 24.63 (s,  $\text{CH}_2\text{CH}_3$ ), 12.85 (s  $\text{CH}_2\text{CH}_3$ ), 5.19 (s,  $\text{Si}(\text{CH}_3)_3$ ).  $^{29}\text{Si}$  NMR (99 MHz,  $\text{C}_6\text{D}_6$ , 298 K):  $\delta$ (ppm) = -2.68.

$[[\text{CH}(\text{CCF}_3\text{NC}_6\text{H}_4\text{-}2,6\text{C}_2\text{H}_5)_2\text{ZnOSiMe}_3]_2]$ , **Complex 2**. 300 mg of complex 1 were solved in 2.0 mL toluene- $d_8$  and pressurized with 40 bar  $\text{CO}_2$  in an autoclave at 50 °C overnight. Carbon dioxide was released (0 °C) and the autoclave was opened in a glovebox. The slightly yellow precipitate (~100 mg) was recrystallized from 15 mL toluene. SC-XRD revealed that the complex is dimeric in the solid state (Figure 3).  $^1\text{H}$  NMR (300 MHz, thf- $d_8$ , 298 K):  $\delta$ (ppm) = 7.16 (s, 12H,  $H_{\text{Aromat}}$ ), 5.85 (s, 2H, CH), 2.79-2.50 (m, 16H,  $\text{CH}_2$ ), 1.30 (t,  $J^3 = 7.6 \text{ Hz}$ , 24H,  $\text{CH}_3$ ), -0.51 (s, 18H,  $\text{OSi}(\text{CH}_3)_3$ ).  $^{13}\text{C}$  NMR (126 MHz,  $\text{C}_6\text{D}_6$ , 298K):  $\delta$ (ppm) = 157.65 (q,  $^2J_{\text{CF}} = 27.7 \text{ Hz}$ ,  $\text{NC}(\text{CF}_3)\text{CHC}(\text{CF}_3)\text{N}$ ), 143.87 (s,  $\text{C}_{\text{Ar}}$ ), 137.58 (s,  $\text{C}_{\text{Ar}}$ ), 127.33 (s,  $\text{C}_{\text{Ar}}$ ), 126.17 (s,  $\text{C}_{\text{Ar}}$ ), 120.80 (q,  $^1J_{\text{CF}} = 291 \text{ Hz}$ ,  $\text{NC}(\text{CF}_3)\text{CHC}(\text{CF}_3)\text{N}$ ), 85.70 (m,  $\text{NC}(\text{CF}_3)\text{CHC}(\text{CF}_3)\text{N}$ ), 24.45 (s,  $\text{CH}_2\text{CH}_3$ ), 13.84 (s,  $\text{CH}_2\text{CH}_3$ ), 3.08 (s,  $\text{OSi}(\text{CH}_3)_3$ ).

**Polymerization procedure.** Copolymerization experiments with *in situ* monitoring were performed using a React-IR/MultiMax four-autoclave system (Mettler-Toledo). 50 mL steel autoclaves equipped with a diamond window, a mechanic stirring and a heating device were heated under vacuum to 130 °C overnight prior to use. The required amount of catalyst was dissolved in 5.0 mL epoxide (+ toluene, if indicated in Table 1+3) in a vial equipped with an injection septum and afterwards rapidly transferred into the reactor using a syringe. The reactor was pressurized and the polymerization was finished by cooling the reactor to 20 °C and release of  $\text{CO}_2$ . The product was dissolved in methylene chloride and transferred to a flask. Afterwards methylene chloride was removed under vacuum and yield and selectivity were determined via NMR/weight of the polymer. The dissolved polymer (methylene chloride) was precipitated from methanol.

[1] O. Hauenstein, M. Reiter, S. Agarwal, B. Rieger and A. Greiner, *Green Chem.*, 2016, **18**, 760-770.

[2] D. Steiner, L. Ivson, C. T. Goralski, R. B. Appell, J. R. Gojkovic and B. Singaram, *Tetrahedron Asymmetry*, 2002, **13**, 2359-2363.

[3] K. Mori, *Tetrahedron Asymmetry*, 2006, **17**, 2133-2142.

[4] A. Kronast, M. Reiter, P. T. Altenbuchner, C. Jandl, A. Pöthig and B. Rieger, *Organometallics*, 2016, **35**, 681-685.

[5] D. T. Carey, E. K. Cope-Eatough, E. Vilaplana-Mafe, F. S. Mair, R. G. Pritchard, J. E. Warren and R. J. Woods, *Dalt. Trans.*, 2003, 1083-1093.

## 1. Pressurizing Catalyst (1) with CO<sub>2</sub>.

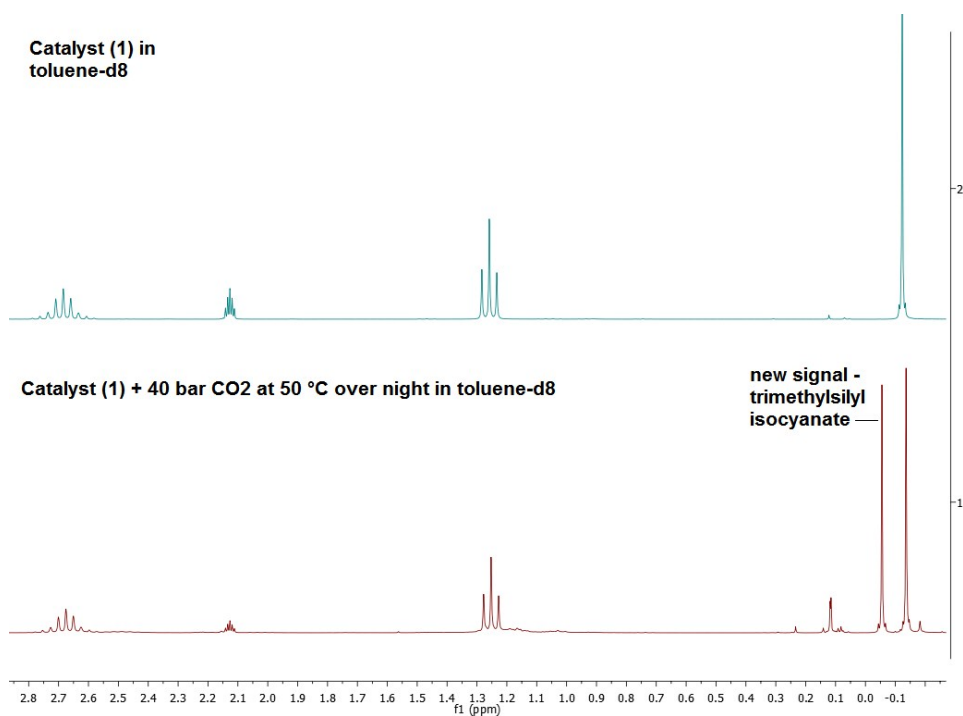

Figure S1. On the top: <sup>1</sup>H-NMR spectrum of catalyst (1) in toluene-d<sub>8</sub>. On the bottom: <sup>1</sup>H-NMR spectrum of catalyst (1) + 40 bar CO<sub>2</sub> at 50 °C over night in toluene-d<sub>8</sub>.

## 2. GPC results of Table 1 and Table 3.

**Table 1**

**Entry 1**

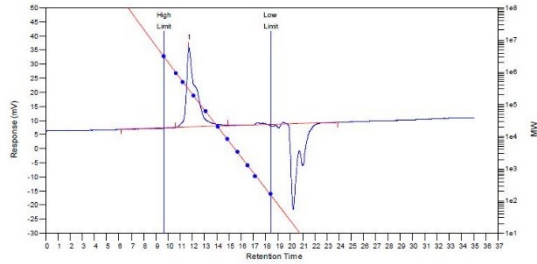

MW Averages

| Peak No | Mp     | Mn     | Mw     | Mz     | Mz+1   | Mv     | PD      |
|---------|--------|--------|--------|--------|--------|--------|---------|
| 1       | 288254 | 134128 | 223217 | 283558 | 339300 | 213584 | 1.66421 |

**Entry 2**

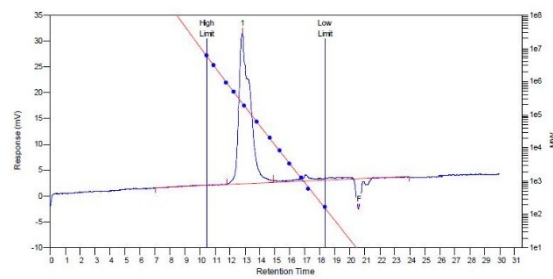

MW Averages

| Peak No | Mp     | Mn     | Mw     | Mz     | Mz+1   | Mv     | PD      |
|---------|--------|--------|--------|--------|--------|--------|---------|
| 1       | 227930 | 134776 | 186847 | 234564 | 284109 | 179814 | 1.38635 |
| 2       | 0      | 0      | 0      | 0      | 0      | 0      | 0       |

**Entry 3**

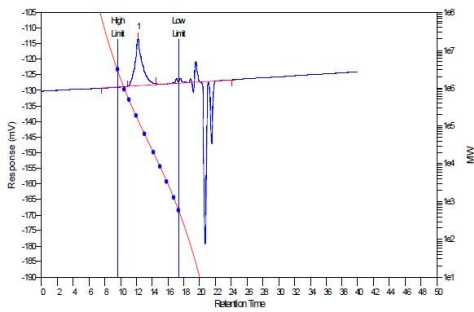

MW Averages

| Peak No | Mp     | Mn    | Mw     | Mz     | Mz+1   | Mv     | PD      |
|---------|--------|-------|--------|--------|--------|--------|---------|
| 1       | 148007 | 97520 | 140558 | 185229 | 233077 | 134270 | 1.44132 |

**Entry 5**

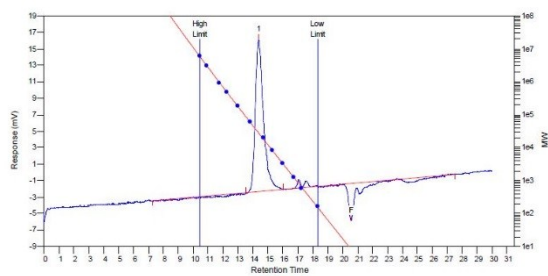

MW Averages

| Peak No | Mp    | Mn    | Mw    | Mz    | Mz+1  | Mv    | PD      |
|---------|-------|-------|-------|-------|-------|-------|---------|
| 1       | 27636 | 21444 | 25773 | 29187 | 32131 | 25227 | 1.20187 |
| 2       | 0     | 0     | 0     | 0     | 0     | 0     | 0       |

**Entry 6**

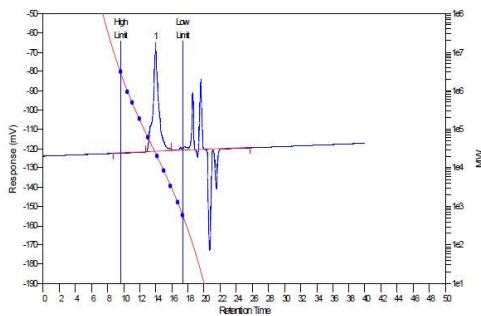

MW Averages

| Peak No | Mp    | Mn    | Mw    | Mz    | Mz+1  | Mv    | PD      |
|---------|-------|-------|-------|-------|-------|-------|---------|
| 1       | 24494 | 19623 | 24762 | 29686 | 34717 | 24041 | 1.26189 |

**Entry 7**

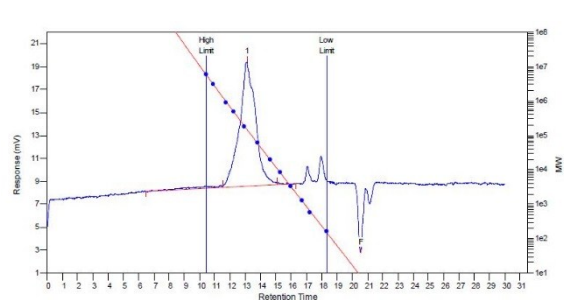

MW Averages

| Peak No | Mp     | Mn     | Mw     | Mz     | Mz+1   | Mv     | PD      |
|---------|--------|--------|--------|--------|--------|--------|---------|
| 1       | 151266 | 106526 | 186099 | 312723 | 476723 | 171604 | 1.74698 |
| 2       | 0      | 0      | 0      | 0      | 0      | 0      | 0       |

**Entry 9**

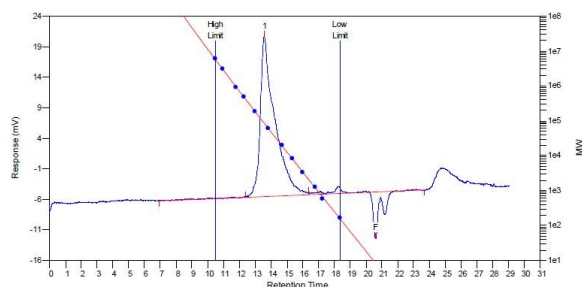

MW Averages

| Peak No | Mp    | Mn    | Mw    | Mz    | Mz+1   | Mv    | PD      |
|---------|-------|-------|-------|-------|--------|-------|---------|
| 1       | 80821 | 32545 | 63213 | 90855 | 119531 | 59155 | 1.94233 |
| 2       | 0     | 0     | 0     | 0     | 0      | 0     | 0       |

**Entry 10**

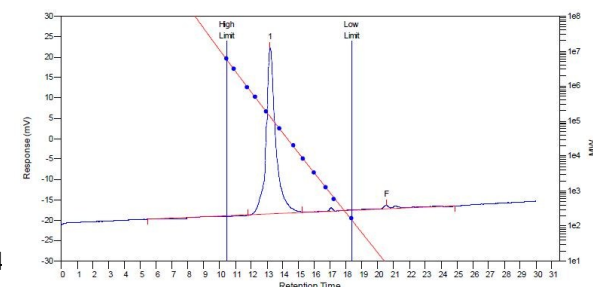

MW Averages

| Peak No | Mp     | Mn    | Mw     | Mz     | Mz+1   | Mv     | PD      |
|---------|--------|-------|--------|--------|--------|--------|---------|
| 1       | 131174 | 94879 | 133025 | 174591 | 234786 | 127647 | 1.40205 |
| 2       | 0      | 0     | 0      | 0      | 0      | 0      | 0       |

### Entry 11

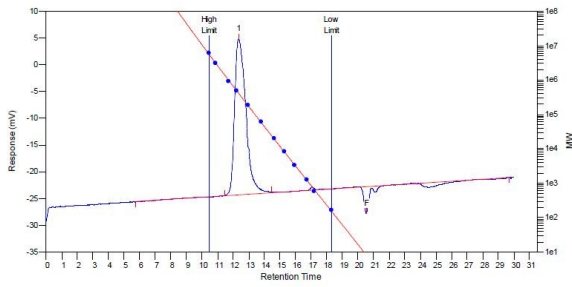

**MW Averages**

| Peak No | Mp     | Mn     | Mw     | Mz     | Mz+1   | Mv     | PD      |
|---------|--------|--------|--------|--------|--------|--------|---------|
| 1       | 411339 | 271984 | 360046 | 432723 | 497941 | 349791 | 1.32709 |
| 2       | 0      | 0      | 0      | 0      | 0      | 0      | 0       |

### Table 3

### Entry 1

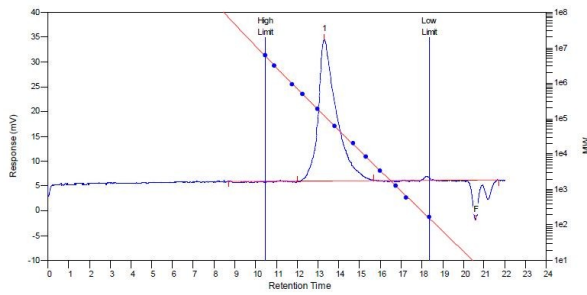

**MW Averages**

| Peak No | Mp     | Mn    | Mw     | Mz     | Mz+1   | Mv    | PD      |
|---------|--------|-------|--------|--------|--------|-------|---------|
| 1       | 120730 | 61887 | 103822 | 146357 | 194488 | 97931 | 1.67761 |
| 2       | 0      | 0     | 0      | 0      | 0      | 0     | 0       |

### Entry 2

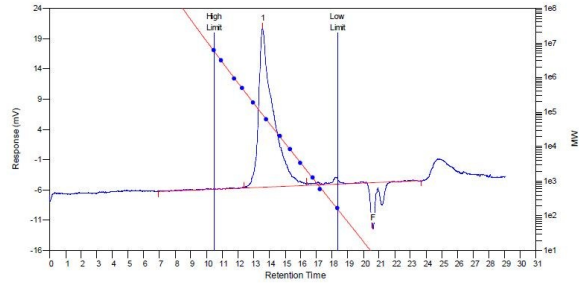

**MW Averages**

| Peak No | Mp    | Mn    | Mw    | Mz    | Mz+1   | Mv    | PD      |
|---------|-------|-------|-------|-------|--------|-------|---------|
| 1       | 80821 | 32545 | 63213 | 90855 | 119531 | 59155 | 1.94233 |
| 2       | 0     | 0     | 0     | 0     | 0      | 0     | 0       |

### Entry 3

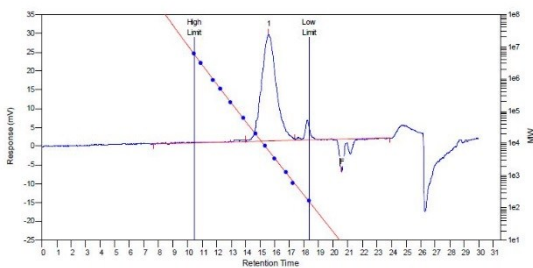

**MW Averages**

| Peak No | Mp   | Mn   | Mw   | Mz    | Mz+1  | Mv   | PD      |
|---------|------|------|------|-------|-------|------|---------|
| 1       | 5980 | 4312 | 6812 | 10133 | 14715 | 6403 | 1.57978 |
| 2       | 0    | 0    | 0    | 0     | 0     | 0    | 0       |

### Entry 4

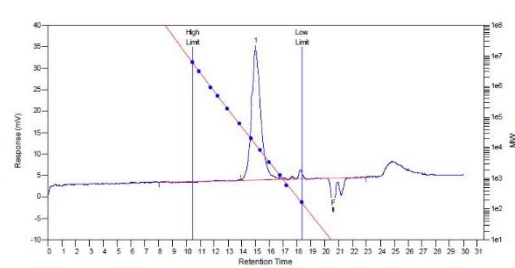

**MW Averages**

| Peak No | Mp    | Mn   | Mw    | Mz    | Mz+1  | Mv    | PD      |
|---------|-------|------|-------|-------|-------|-------|---------|
| 1       | 12611 | 9968 | 12708 | 15468 | 18491 | 12314 | 1.27488 |
| 2       | 0     | 0    | 0     | 0     | 0     | 0     | 0       |

### Entry 5

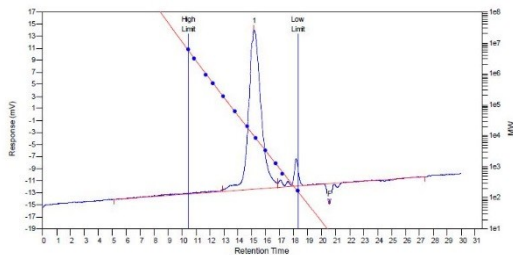

**MW Averages**

| Peak No | Mp   | Mn   | Mw    | Mz    | Mz+1  | Mv    | PD      |
|---------|------|------|-------|-------|-------|-------|---------|
| 1       | 9643 | 7217 | 12319 | 32554 | 86356 | 11053 | 1.70694 |
| 2       | 0    | 0    | 0     | 0     | 0     | 0     | 0       |

### Entry 6

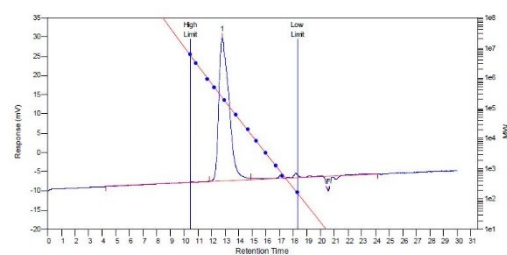

**MW Averages**

| Peak No | Mp     | Mn     | Mw     | Mz     | Mz+1   | Mv     | PD      |
|---------|--------|--------|--------|--------|--------|--------|---------|
| 1       | 237109 | 145274 | 196978 | 238610 | 278149 | 189434 | 1.34502 |
| 2       | 0      | 0      | 0      | 0      | 0      | 0      | 0       |

### Entry 7

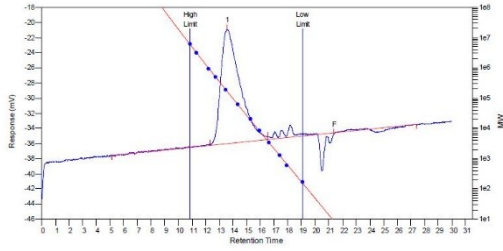

#### MW Averages

| Peak No | Mp     | Mn    | Mw     | Mz     | Mz+1   | Mv     | PD      |
|---------|--------|-------|--------|--------|--------|--------|---------|
| 1       | 163243 | 56092 | 138489 | 223954 | 300881 | 126324 | 2.46896 |
| 2       | 0      | 0     | 0      | 0      | 0      | 0      | 0       |

### Entry 8

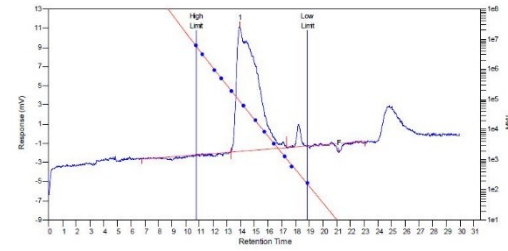

#### MW Averages

| Peak No | Mp    | Mn    | Mw    | Mz    | Mz+1  | Mv    | PD      |
|---------|-------|-------|-------|-------|-------|-------|---------|
| 1       | 90308 | 18913 | 46651 | 73134 | 91357 | 42623 | 2.46661 |
| 2       | 0     | 0     | 0     | 0     | 0     | 0     | 0       |

### Entry 9

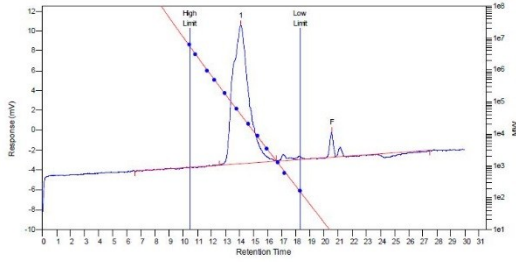

#### MW Averages

| Peak No | Mp    | Mn    | Mw    | Mz    | Mz+1  | Mv    | PD      |
|---------|-------|-------|-------|-------|-------|-------|---------|
| 1       | 39942 | 24028 | 45232 | 66088 | 85701 | 42240 | 1.88247 |
| 2       | 0     | 0     | 0     | 0     | 0     | 0     | 0       |

### Entry 10

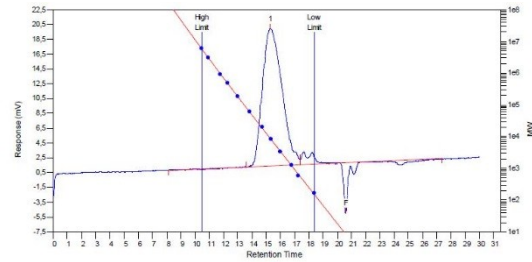

#### MW Averages

| Peak No | Mp   | Mn   | Mw   | Mz    | Mz+1  | Mv   | PD     |
|---------|------|------|------|-------|-------|------|--------|
| 1       | 8493 | 4593 | 8949 | 14360 | 19826 | 8232 | 1.9484 |
| 2       | 0    | 0    | 0    | 0     | 0     | 0    | 0      |

### Entry 13

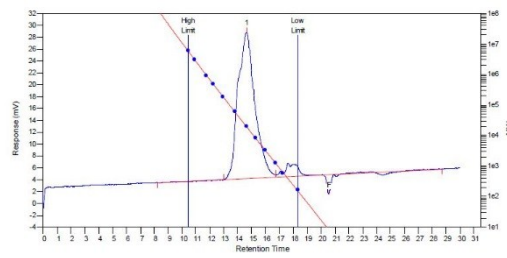

#### MW Averages

| Peak No | Mp    | Mn    | Mw    | Mz    | Mz+1  | Mv    | PD      |
|---------|-------|-------|-------|-------|-------|-------|---------|
| 1       | 19528 | 12844 | 23614 | 36589 | 50315 | 21889 | 1.83852 |
| 2       | 0     | 0     | 0     | 0     | 0     | 0     | 0       |

### Entry 14

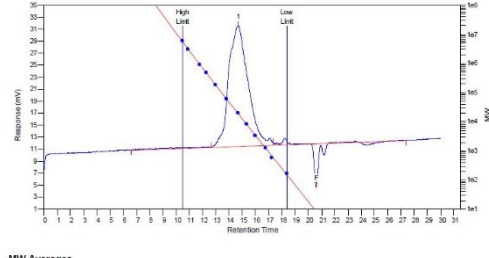

#### MW Averages

| Peak No | Mp    | Mn   | Mw    | Mz    | Mz+1  | Mv    | PD      |
|---------|-------|------|-------|-------|-------|-------|---------|
| 1       | 19587 | 9466 | 24833 | 48832 | 85455 | 22001 | 2.60226 |
| 2       | 0     | 0    | 0     | 0     | 0     | 0     | 0       |

### Entry 15

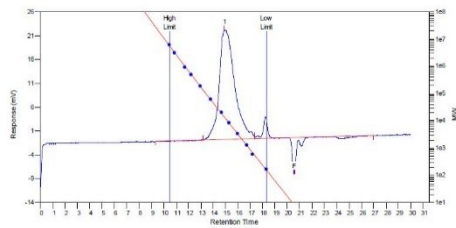

#### MW Averages

| Peak No | Mp    | Mn   | Mw    | Mz    | Mz+1  | Mv    | PD      |
|---------|-------|------|-------|-------|-------|-------|---------|
| 1       | 13126 | 6014 | 12806 | 23068 | 36959 | 11665 | 2.12936 |
| 2       | 0     | 0    | 0     | 0     | 0     | 0     | 0       |

### 3. Ring Opening Polymerizations of CHO, PO, LO with catalyst 1-3 (Table 3).

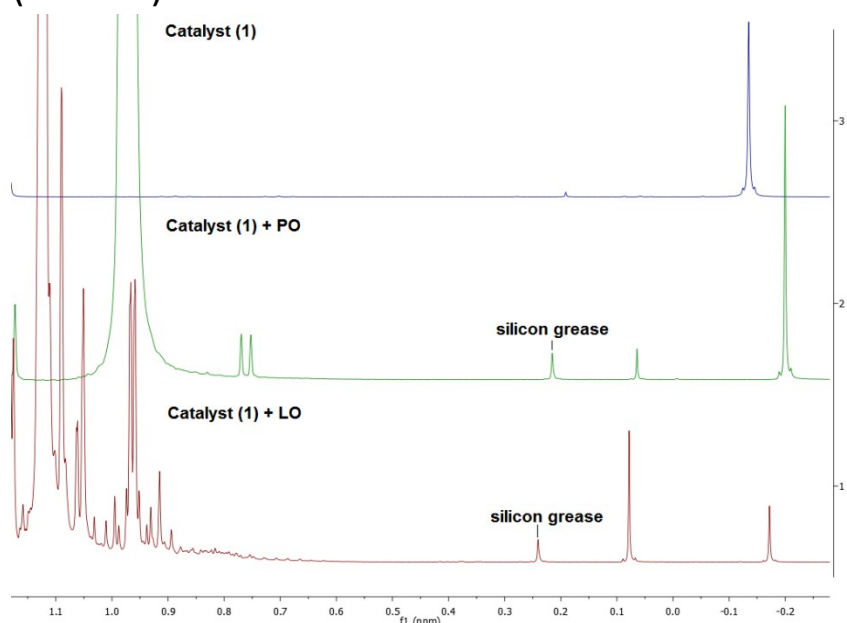

Figure S2. <sup>1</sup>H-NMR section (1.2ppm- (-0.2 ppm)) of Table 2, Entries 2+3. On top: <sup>1</sup>H NMR of Catalyst (1) in C<sub>6</sub>D<sub>6</sub>, -ZnNSi(CH<sub>3</sub>)<sub>3</sub>. In the middle: <sup>1</sup>H NMR of Catalyst (1) in C<sub>6</sub>D<sub>6</sub> + 500 eq. propylene oxide. On the bottom: <sup>1</sup>H NMR of Catalyst (1) in C<sub>6</sub>D<sub>6</sub> + 250 eq. limonene oxide.

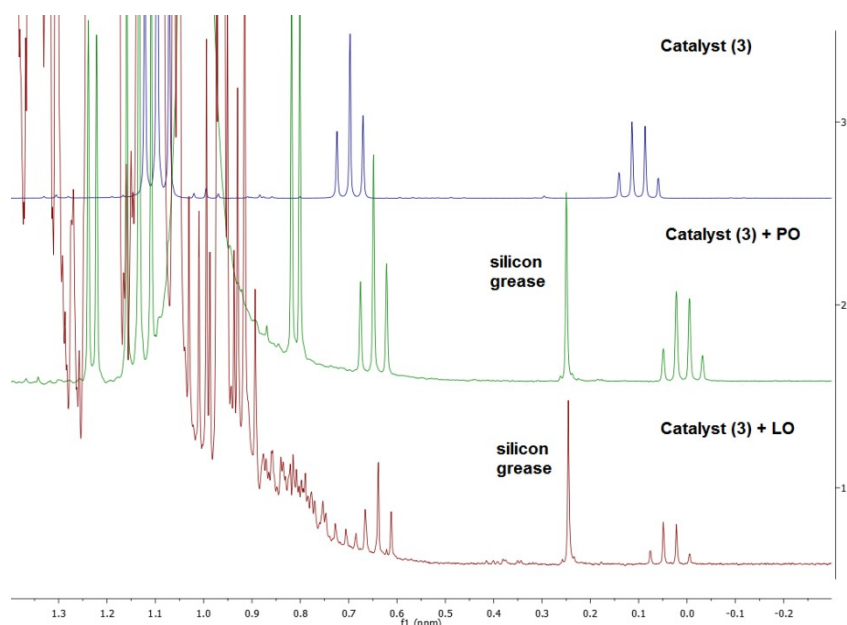

Figure S3. <sup>1</sup>H-NMR section (1.3ppm- (-0.3 ppm)) of Table 2, Entries 8+9. On top: <sup>1</sup>H NMR of Catalyst (3) in C<sub>6</sub>D<sub>6</sub>, -ZnNSi(CH<sub>3</sub>)<sub>3</sub>. In the middle: <sup>1</sup>H NMR of Catalyst (3) in C<sub>6</sub>D<sub>6</sub> + 500 eq. propylene oxide. On the bottom: <sup>1</sup>H NMR of Catalyst (3) in C<sub>6</sub>D<sub>6</sub> + 250 eq. limonene oxide.

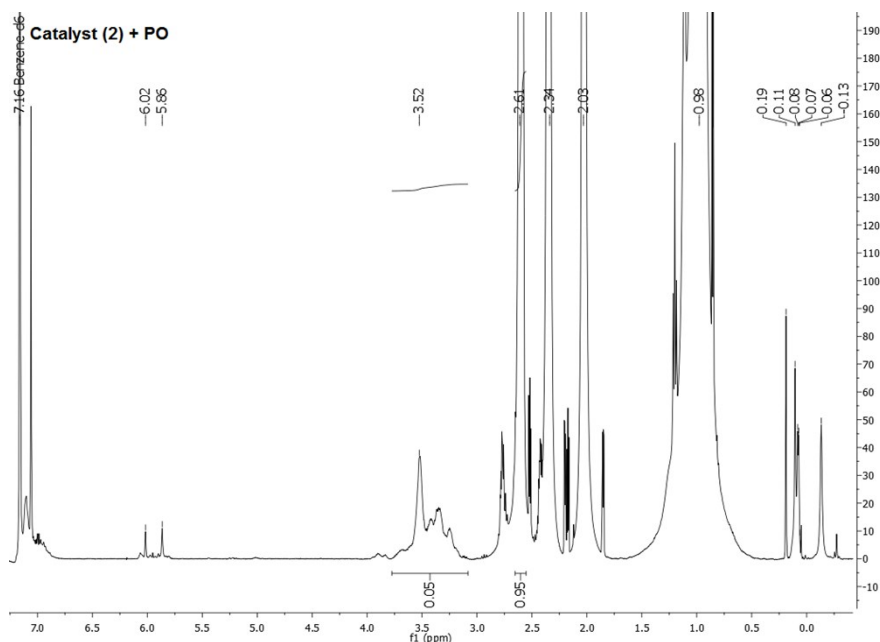

Figure S4.  $^1\text{H}$ -NMR section of Table 2, Entry 5. Catalyst (2) + 500 eq. propylene oxide in  $\text{C}_6\text{D}_6$ . No NMR spectrum of the catalyst provided as it is insoluble in benzene.

#### 4. Calibration curve for *in situ* determination of the TOF

a

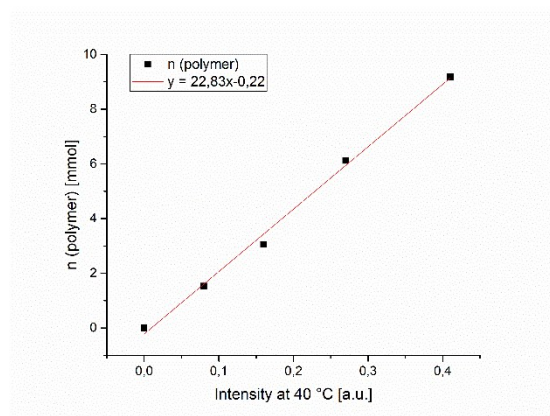

b

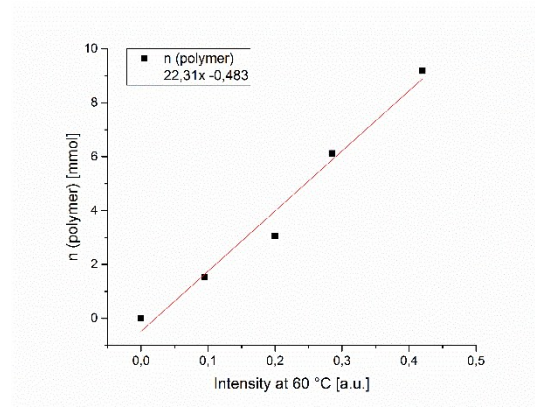

c

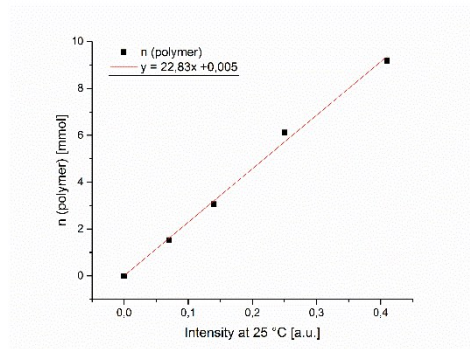

Figure S5. Calibration curve: Intensity of the carbonyl stretching bond  $\nu(\text{C}=\text{O})$  of PLimC determined in the *in situ* IR autoclave reactor 1 against n(polymer) a) 40°C b) 60°C c) 25°C.



## 5. *In situ* IR spectra for Copolymerization results of CO<sub>2</sub> and Limonene oxide.

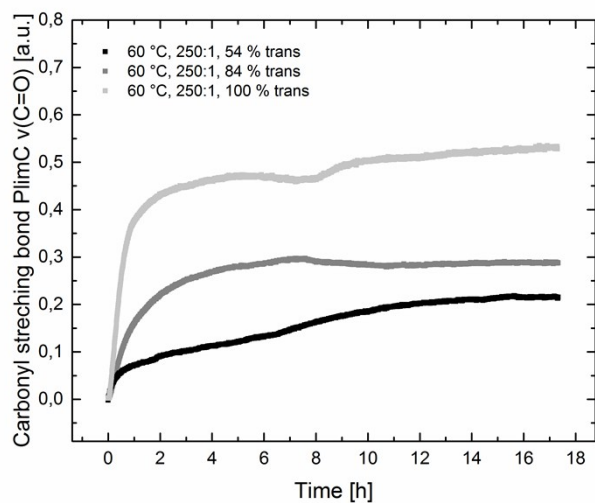

Figure S6. Intensity of the carbonyl stretching bond of PlimC in a.u. against time in hours. Data from Table 3, Entries 3+5+7 at 60 °C, 30 bar 250:1 (0.4 mol%).

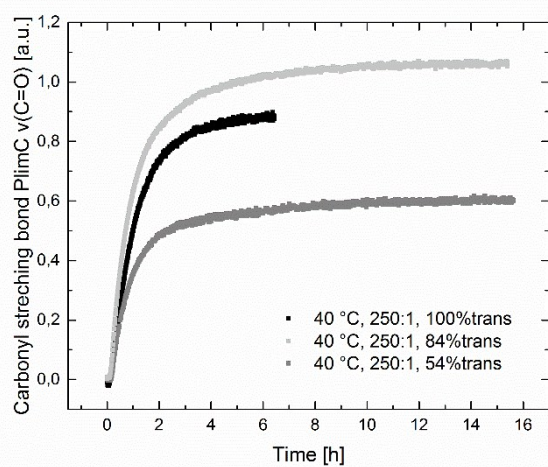

Figure S7. Intensity of the carbonyl stretching bond of PlimC in a.u. against time in hours. Data from Table 3, Entries 2+4+6 at 40 °C, 30 bar 250:1 (0.4 mol%).

## 6. DSC Analysis of the terpolymers

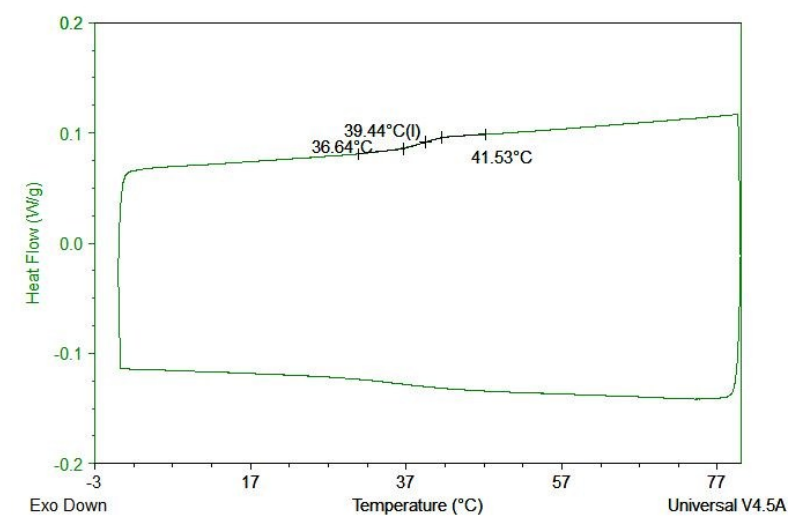

a)

b)

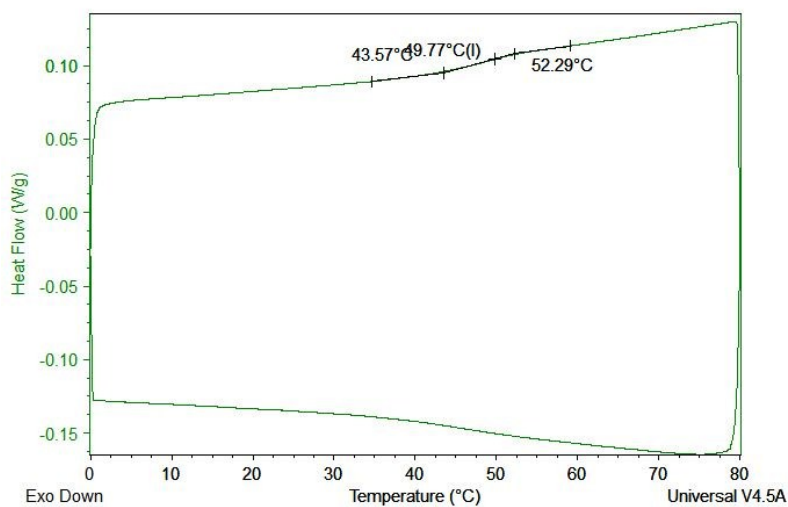

Figure S8. a) DSC curve (heating rate 5K/min) for terpolymer (PLimC-PPC), Table 1, Entry 10; b) DSC curve (heating rate 5K/min) for terpolymer (PCHC-PPC), Table 1, Entry 11.

## 7. UV-Vis Analysis of the terpolymers

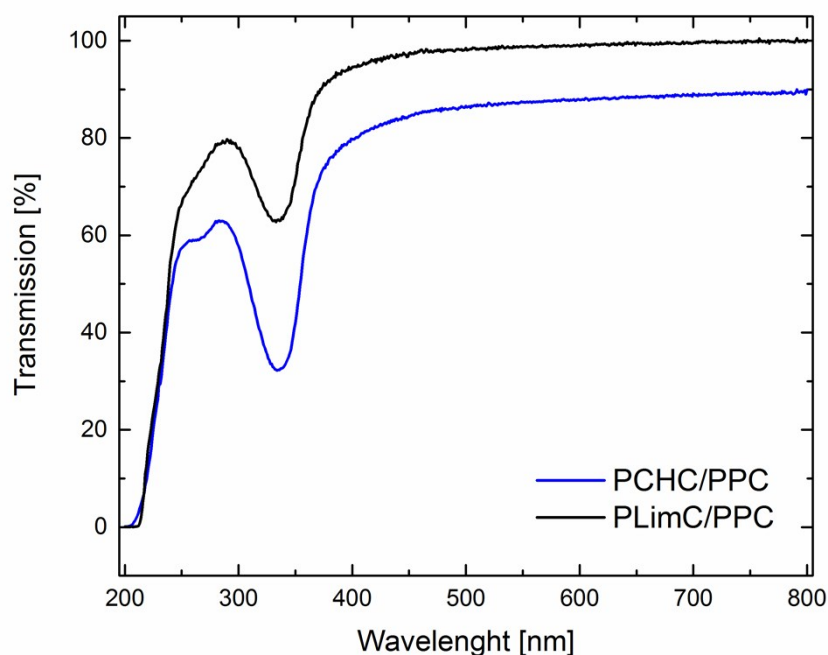

Figure S9. UV-Vis spectrum of two different terpolymers from 200-800 nm: blue line CHO/PO/CO<sub>2</sub>. Black line LO/PO/CO<sub>2</sub>.

## 8. Synthesis and analysis (GPC, NMR) of Poly(menthene carbonate)

Table S1 Copolymerization of menthene oxide and carbon dioxide with catalyst (1).

| Entry | [MenO]:[1] | % <i>trans</i><br>LO | V (tol)<br>[mL] | Press<br>ure<br>[bar] | T[°C] | Time<br>[h] | Yield<br>[%] | Yield<br><i>trans</i> -LO<br>[%] | Trans/Cis*/<br>Trans* [%] | M <sub>n</sub> (PDI) <sup>e</sup><br>[g/mol] |
|-------|------------|----------------------|-----------------|-----------------------|-------|-------------|--------------|----------------------------------|---------------------------|----------------------------------------------|
| 1     | 250        | 54                   | 2               | 30                    | 25    | 16          | 43           | 80                               | 100:0:0                   | 149 000 (1.2)                                |
| 2     | 250        | 54                   | 2               | 30                    | 60    | 16          | 4            | 8                                | -                         | 5700 (1.3)                                   |

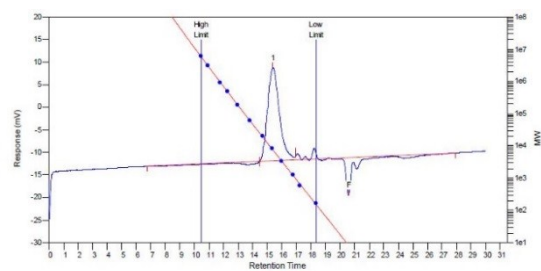

MW Averages

| Peak No | Mp   | Mn   | Mw   | Mz   | Mz+1  | Mv   | PD      |
|---------|------|------|------|------|-------|------|---------|
| 1       | 7324 | 5663 | 7512 | 9336 | 11093 | 7243 | 1.32651 |
| 2       | 0    | 0    | 0    | 0    | 0     | 0    | 0       |

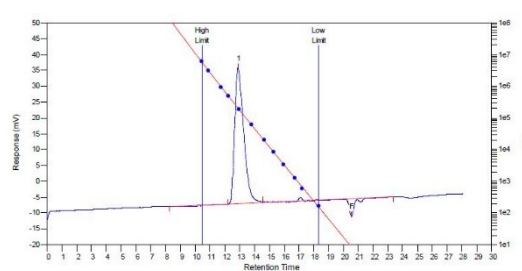

MW Averages

| Peak No | Mp     | Mn     | Mw     | Mz     | Mz+1   | Mv     | PD      |
|---------|--------|--------|--------|--------|--------|--------|---------|
| 1       | 200862 | 149126 | 180252 | 206178 | 228783 | 176165 | 1.20872 |
| 2       | 0      | 0      | 0      | 0      | 0      | 0      | 0       |

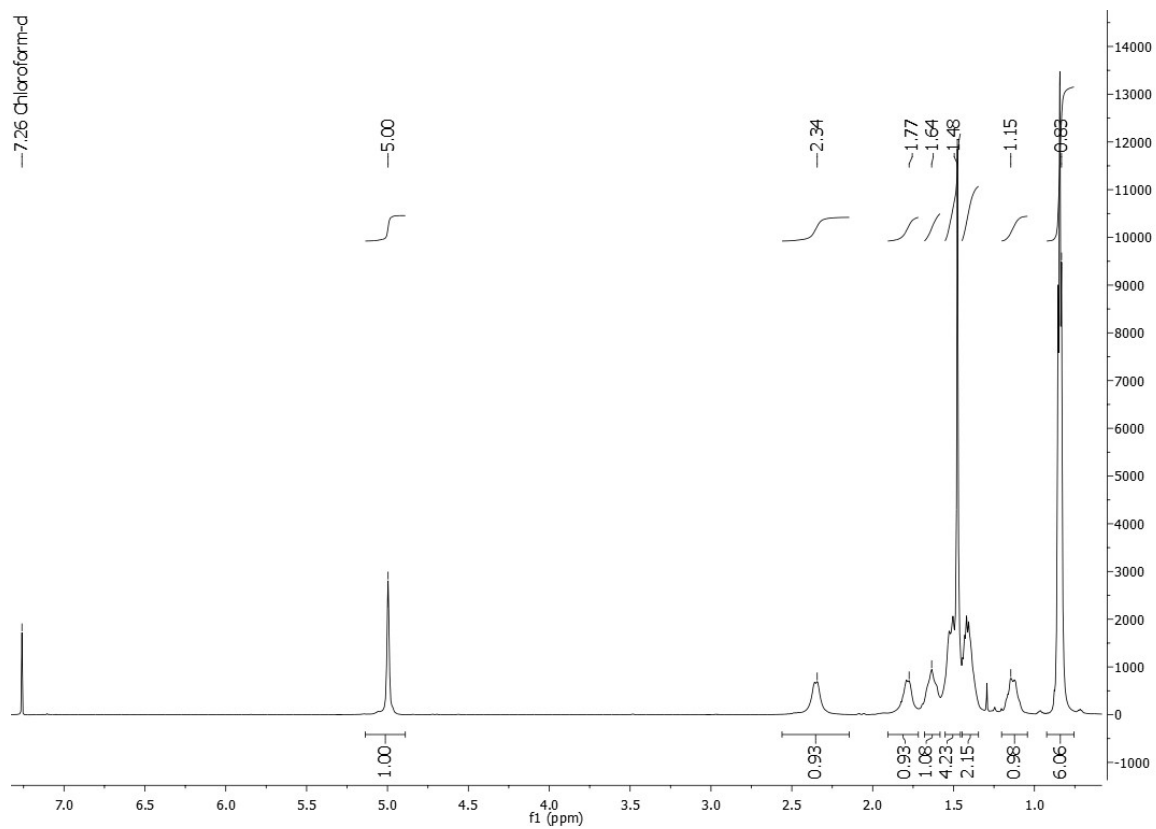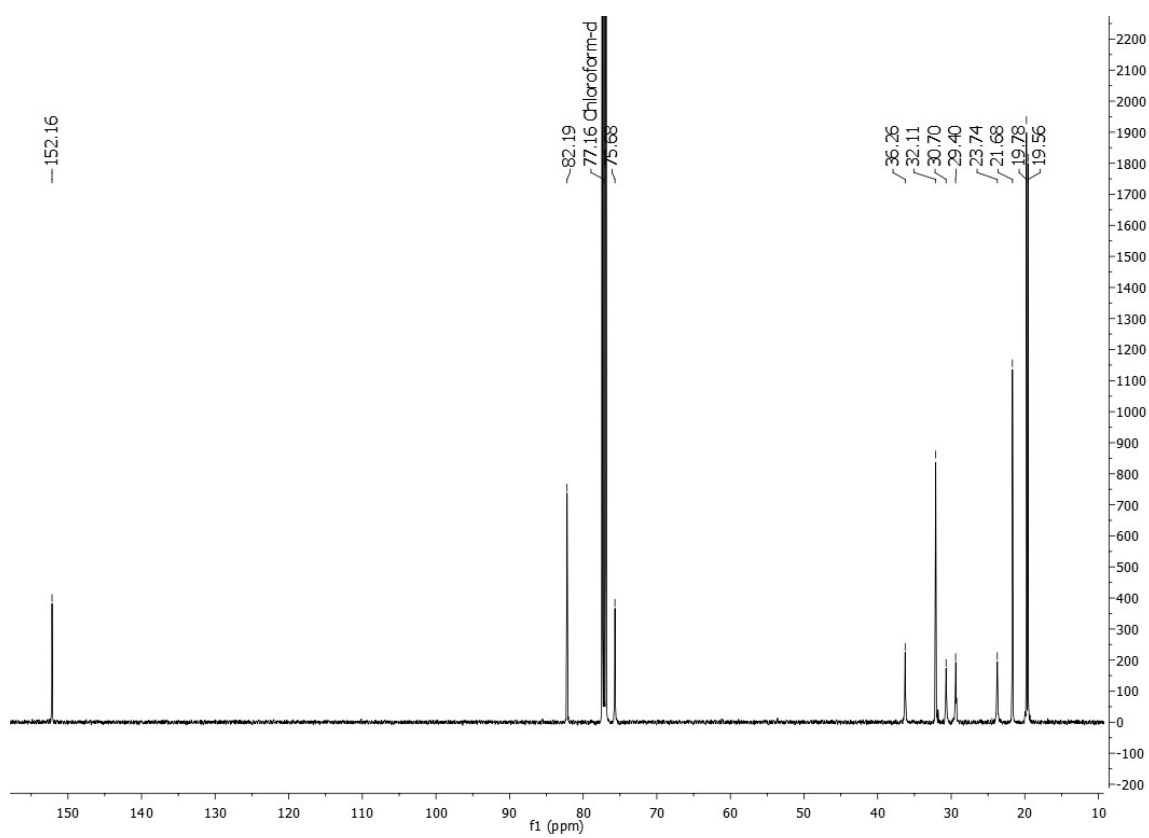

Figure S10.  $^1\text{H}$  and  $^{13}\text{C}$  NMR spectra of PMenC (Table S1, Entry 1).

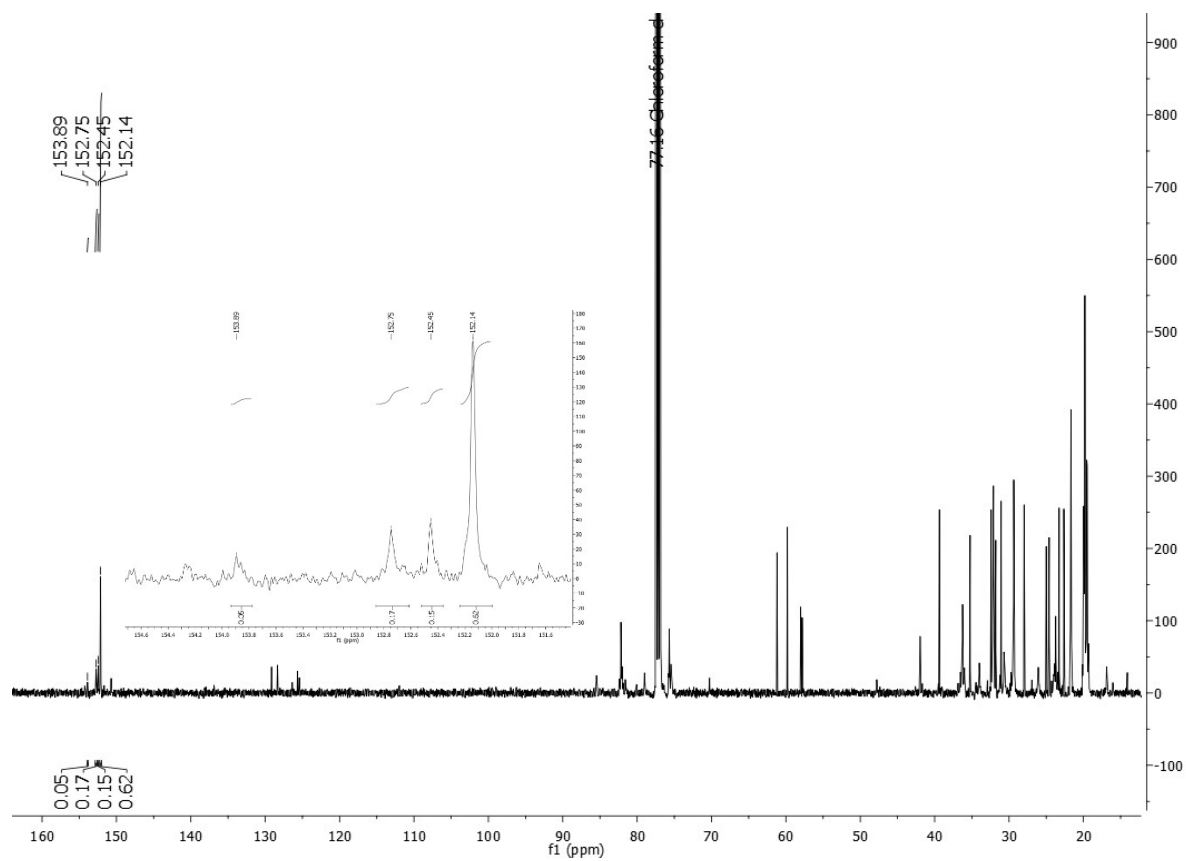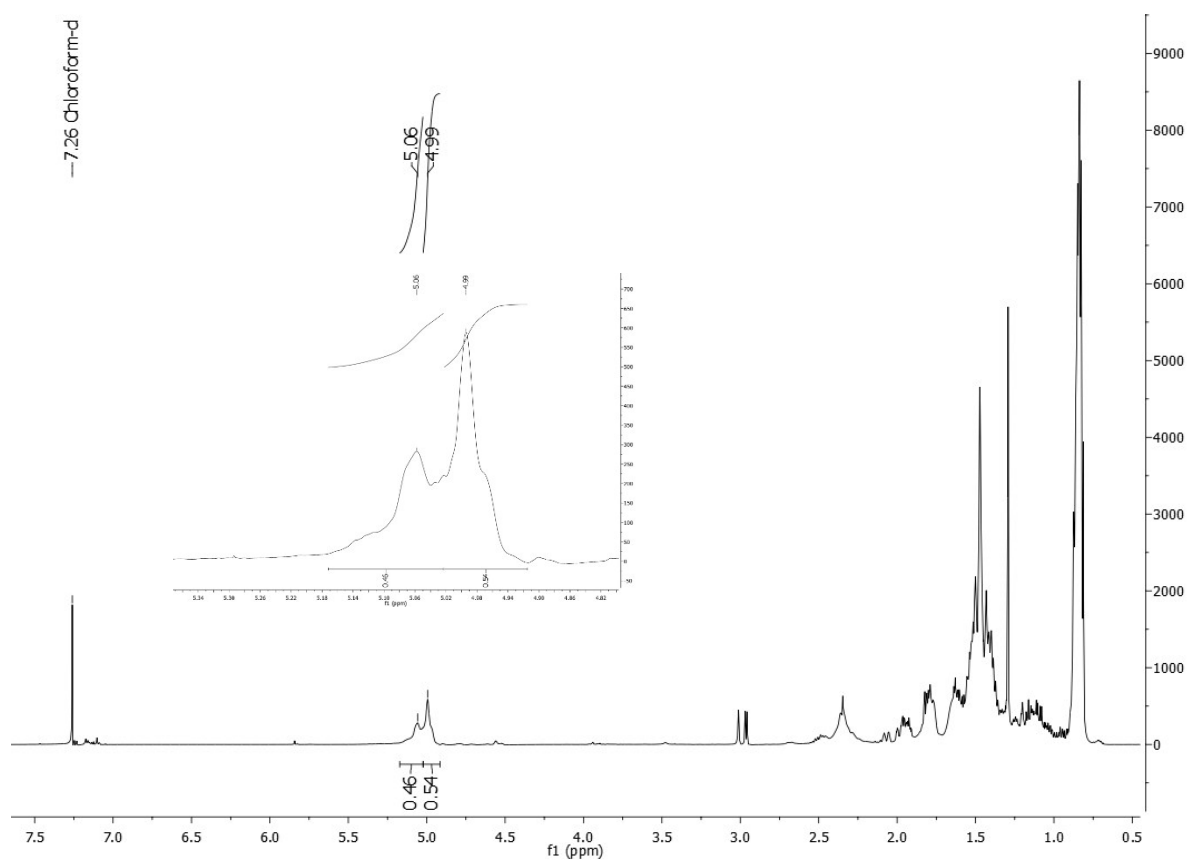

Figure S11.  $^1\text{H}$  and  $^{13}\text{C}$  NMR spectra of PMenC (Table S1, Entry 2).

## 9. $^1\text{H}$ and $^{13}\text{C}$ NMR spectra of selected precipitated polymer samples

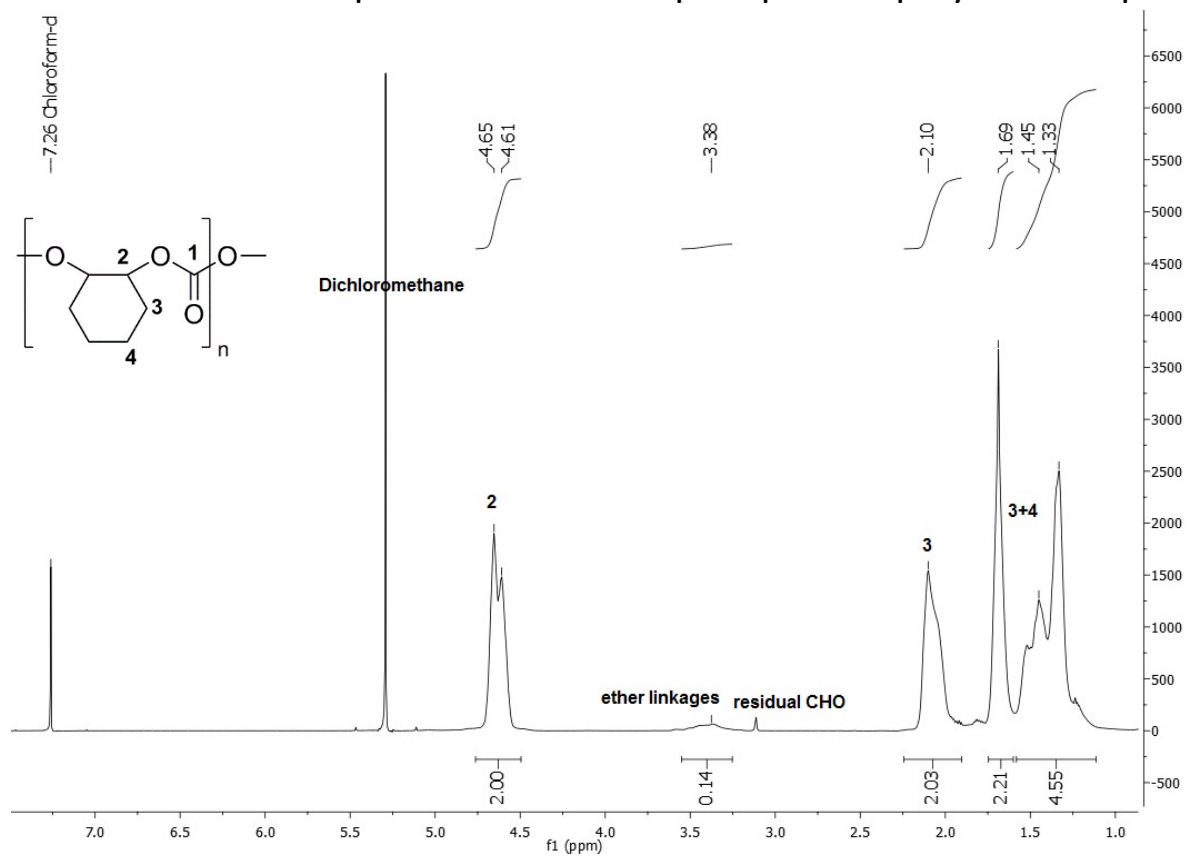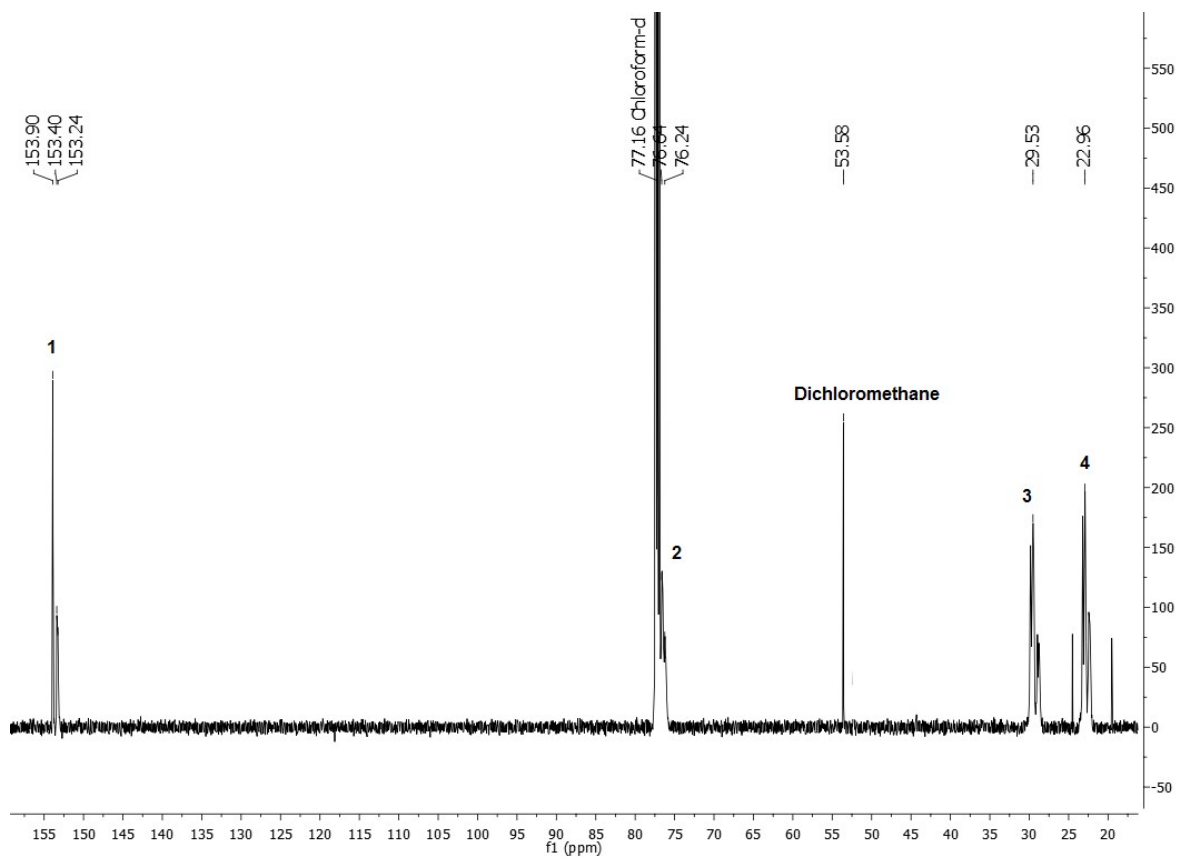

Figure S12.  $^1\text{H}$  and  $^{13}\text{C}$  NMR spectra of Poly(cyclohexene carbonate), Table 1, Entry 2.

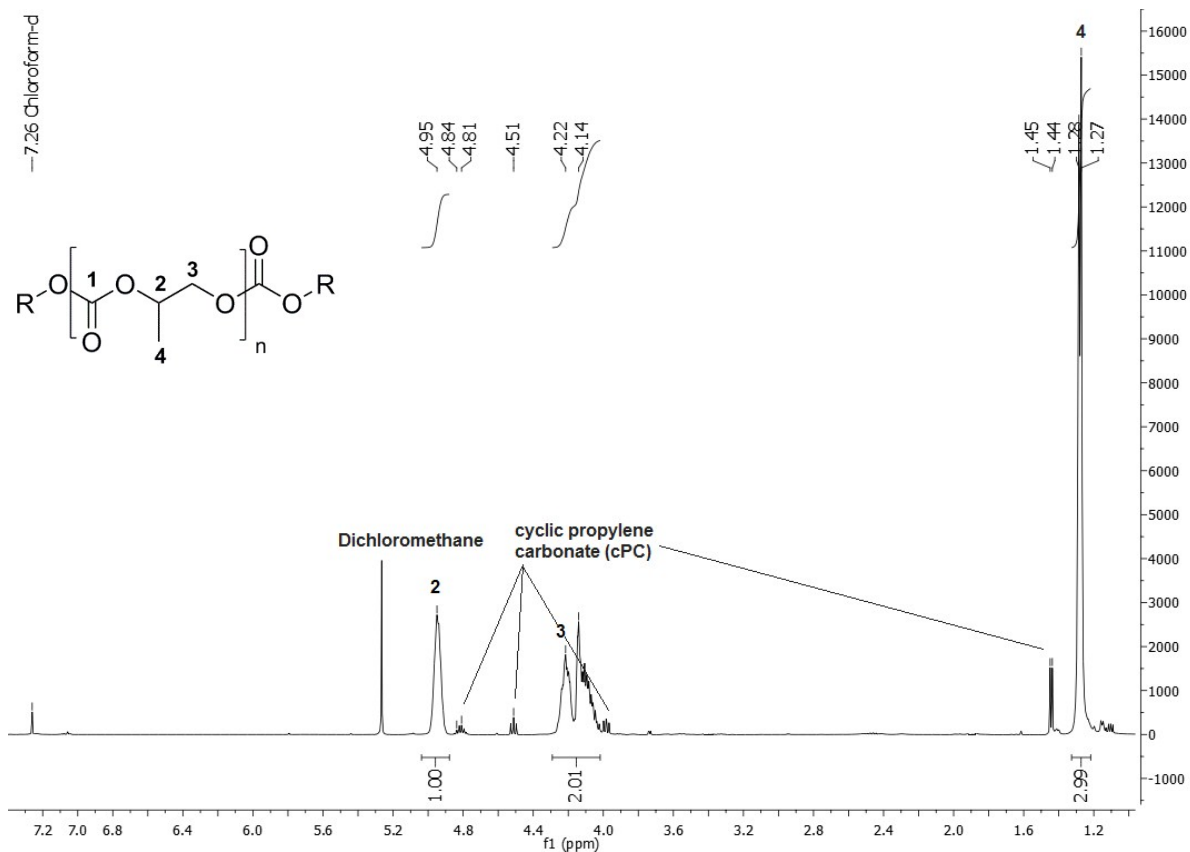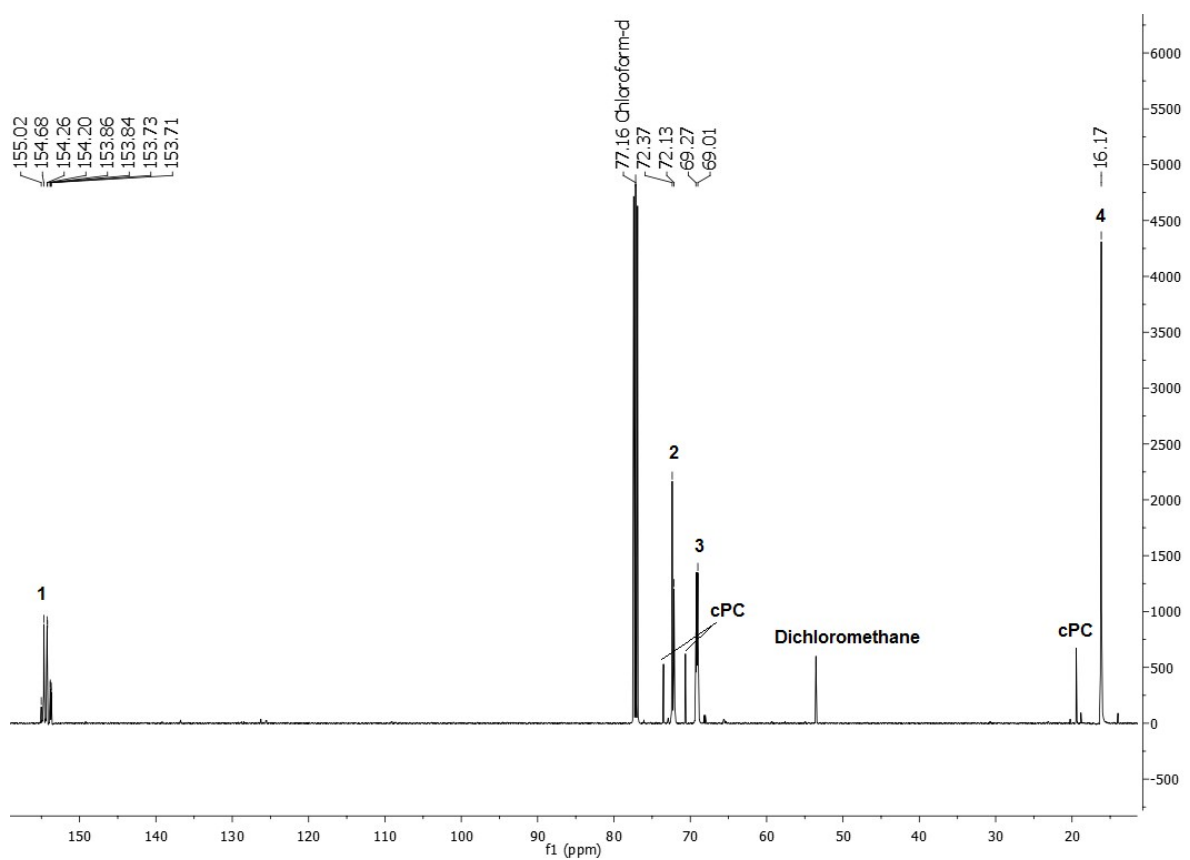

Figure S13.  $^1\text{H}$  and  $^{13}\text{C}$  NMR spectra of Poly(propylene carbonate), Table 1, Entry 5.

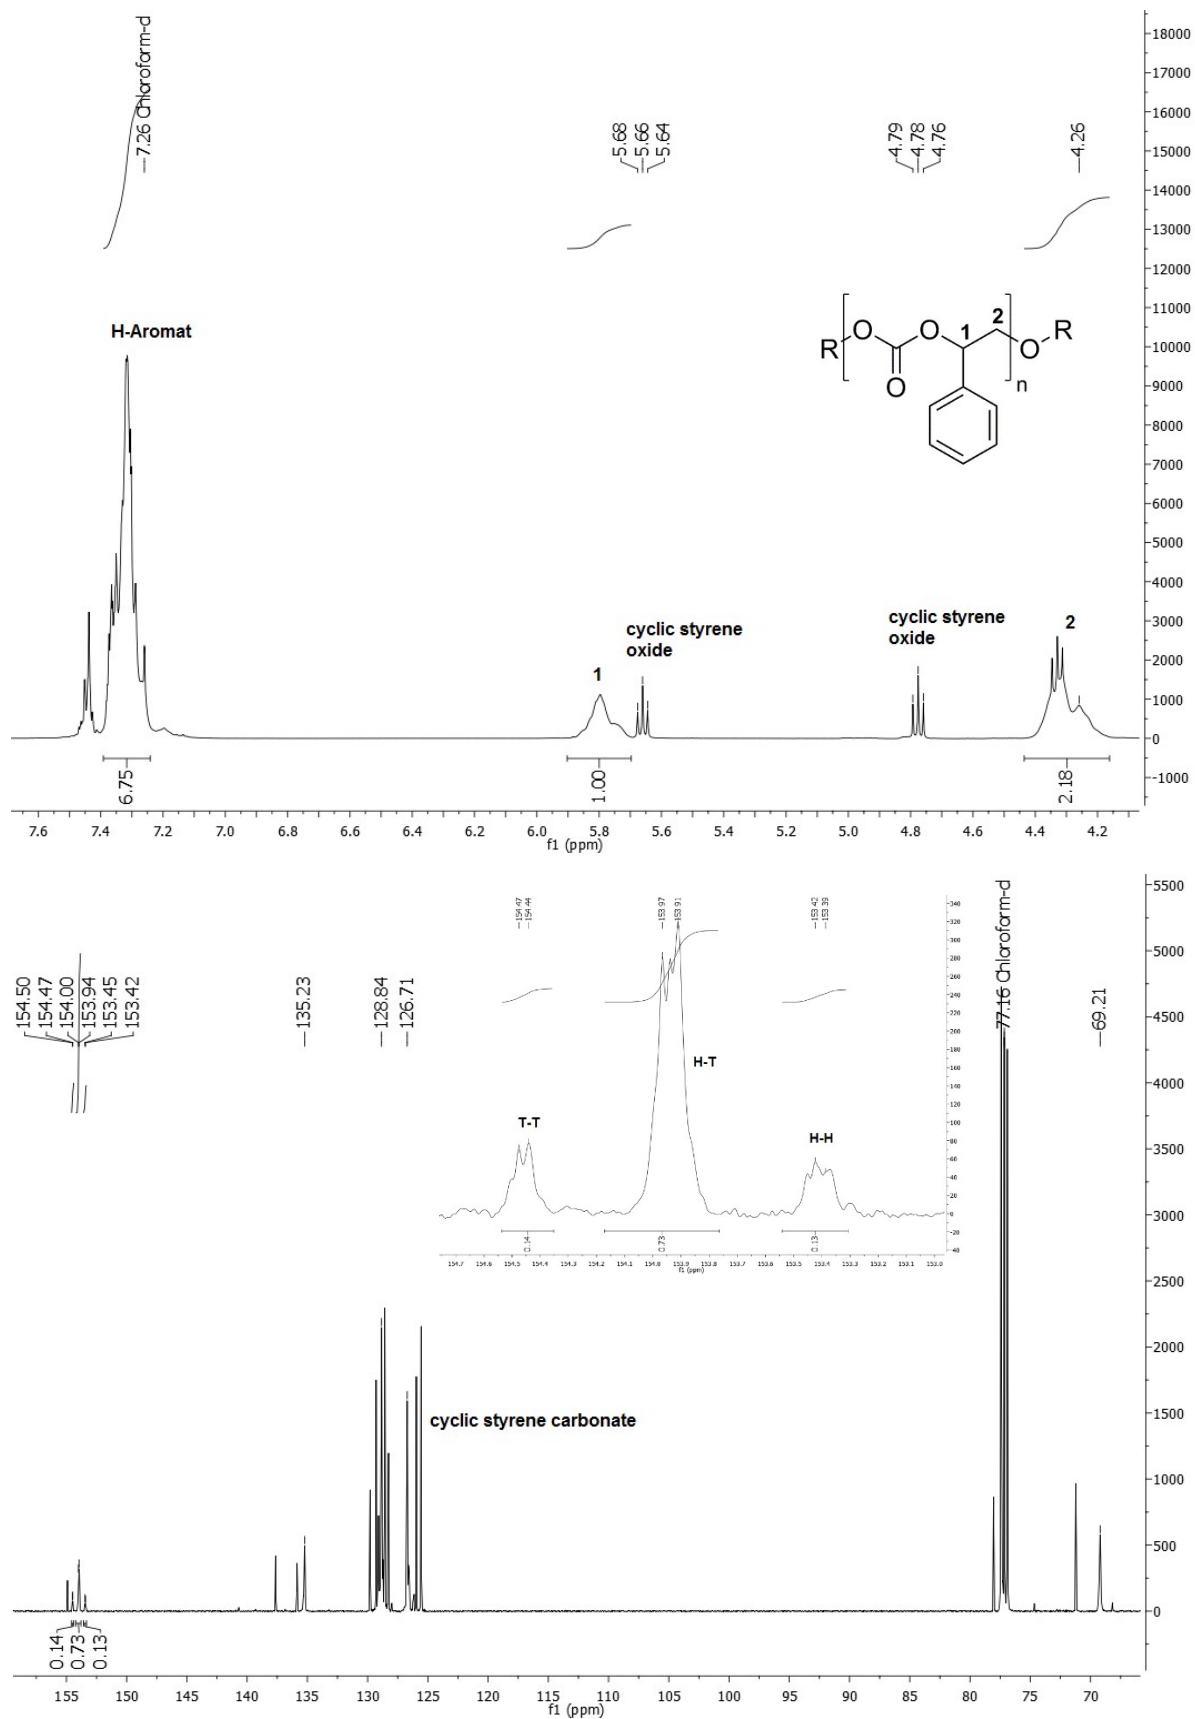

Figure S14. <sup>1</sup>H and <sup>13</sup>C NMR spectra of Poly(styrene carbonate), Table 1, Entry 6.



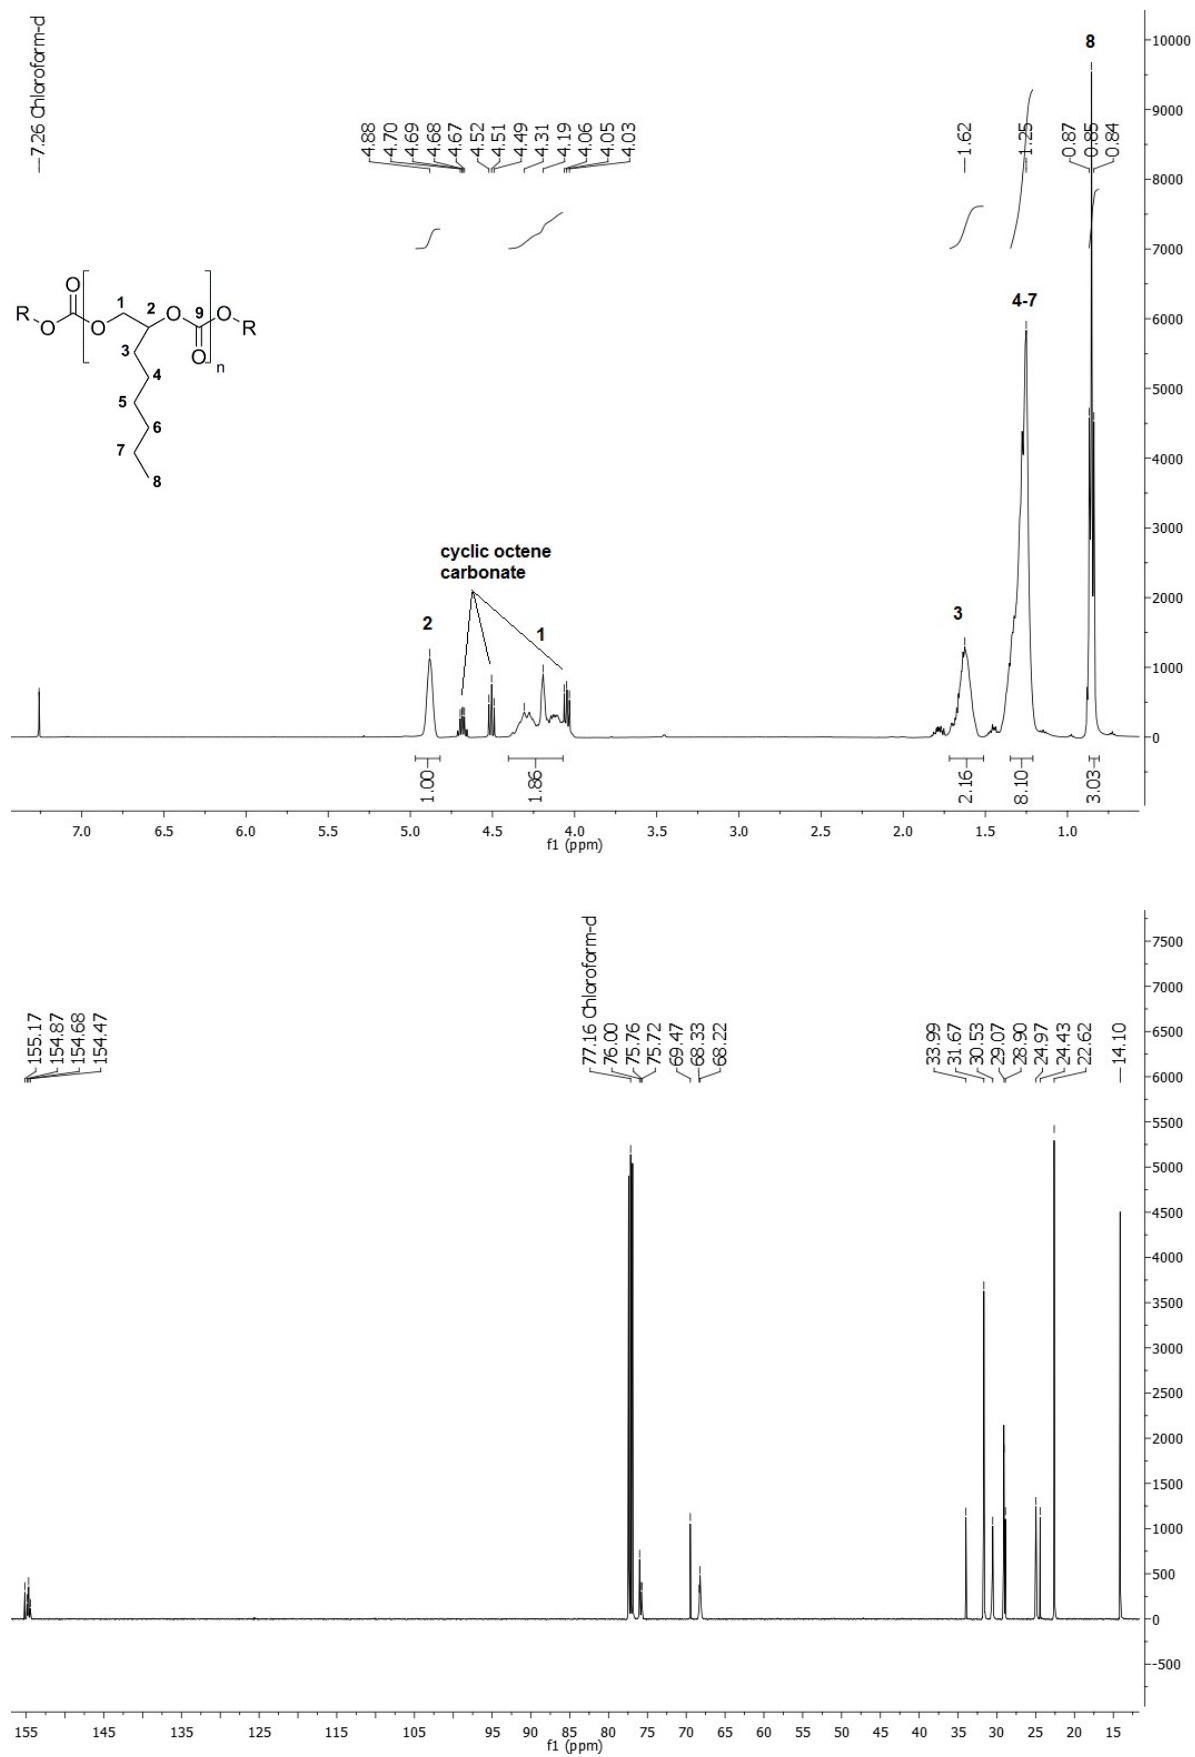

Figure S15. <sup>1</sup>H and <sup>13</sup>C NMR spectra of Poly(octene carbonate), Table 1, Entry 7.

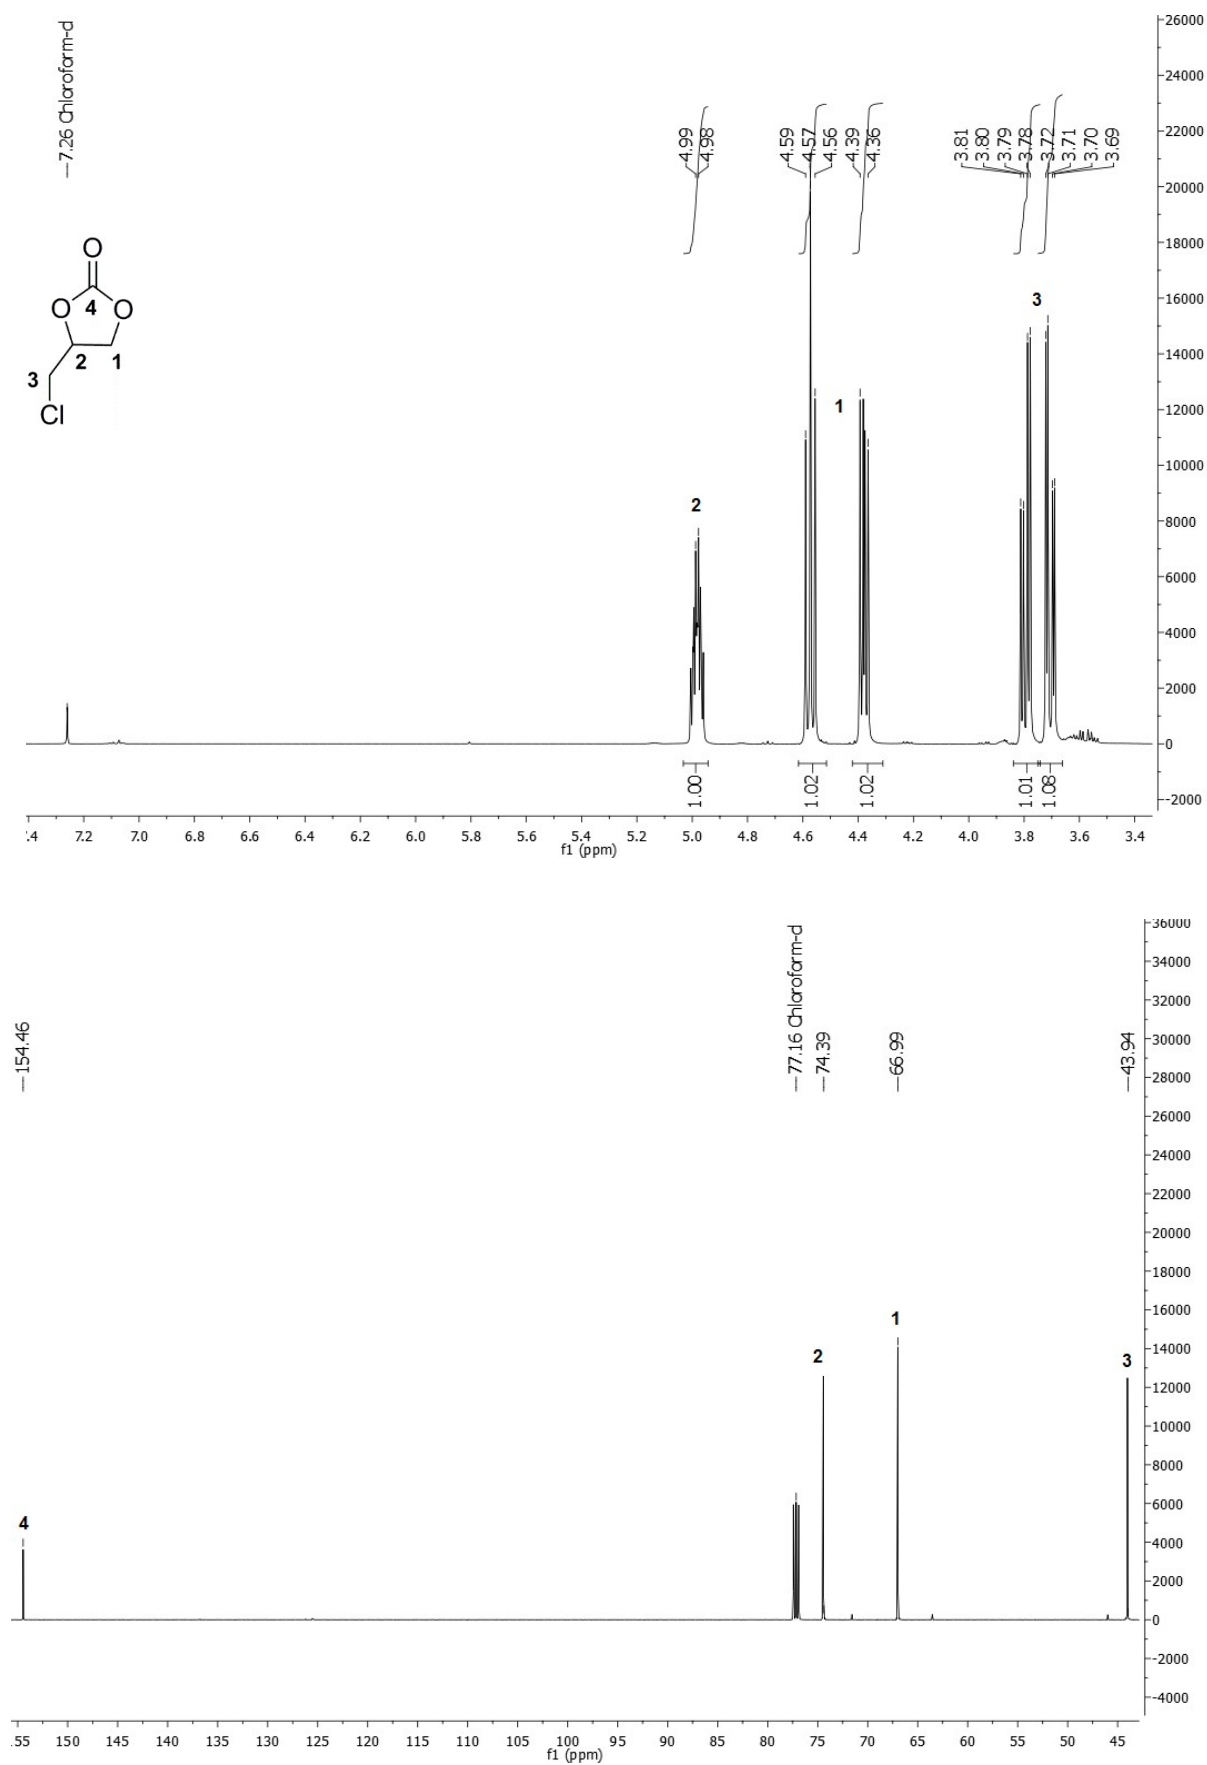

Figure S16. <sup>1</sup>H and <sup>13</sup>C NMR spectra of Cyclic epichlorohydrin carbonate, Table 1, Entry 8.

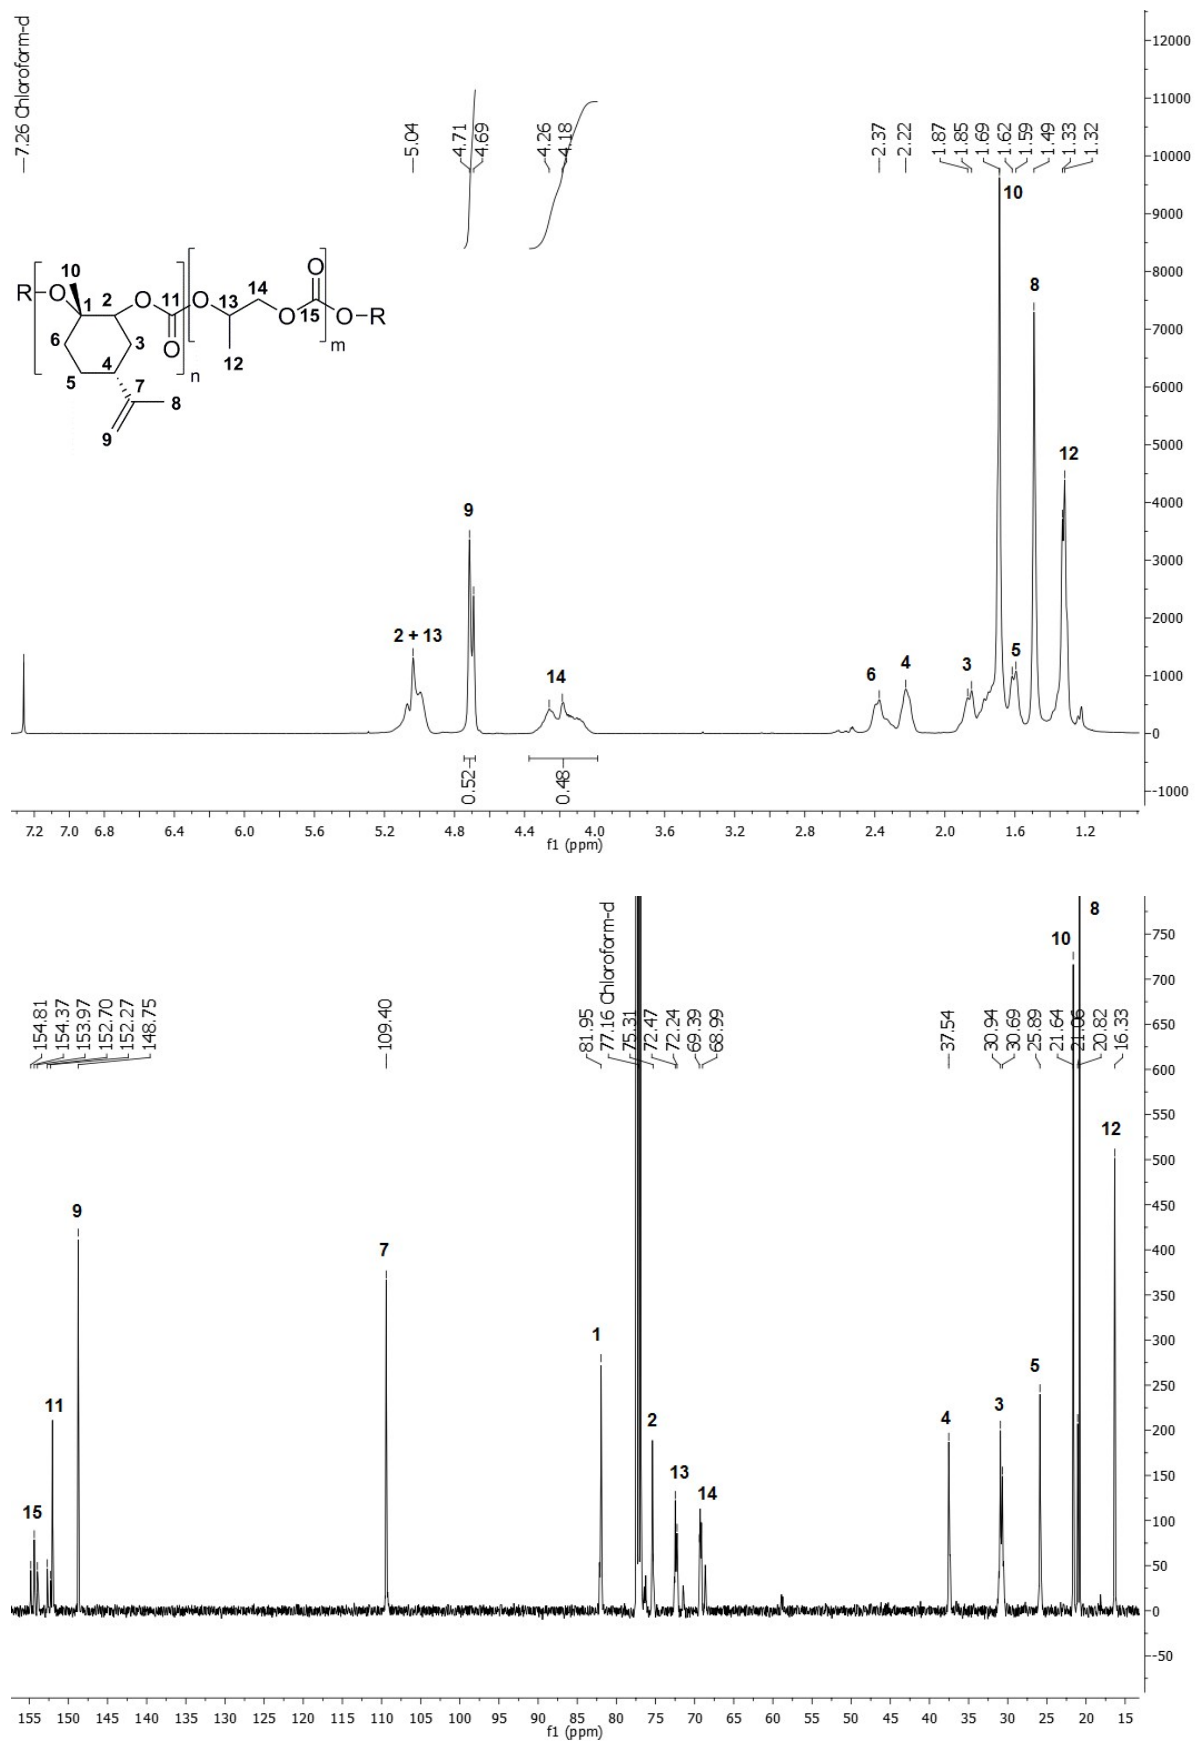

Figure S17. <sup>1</sup>H and <sup>13</sup>C NMR spectra of Terpolymer PLimC/PPC, Table 1, Entry 10.

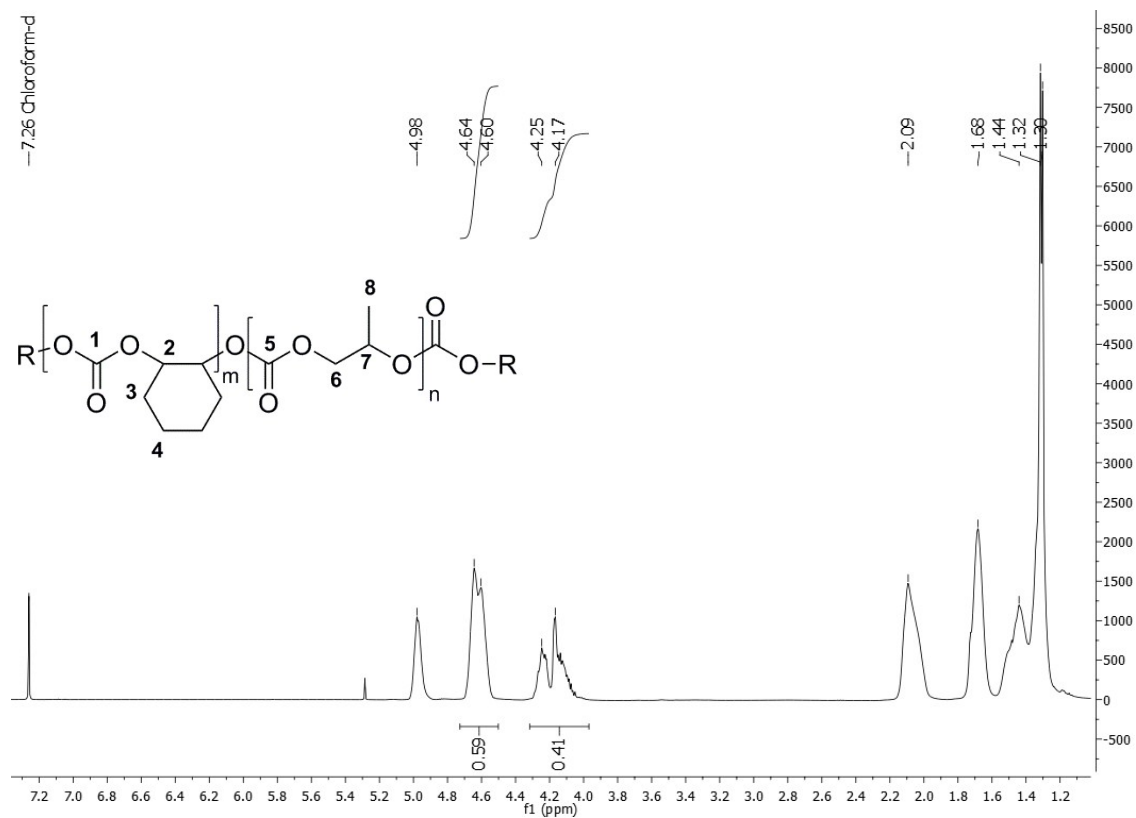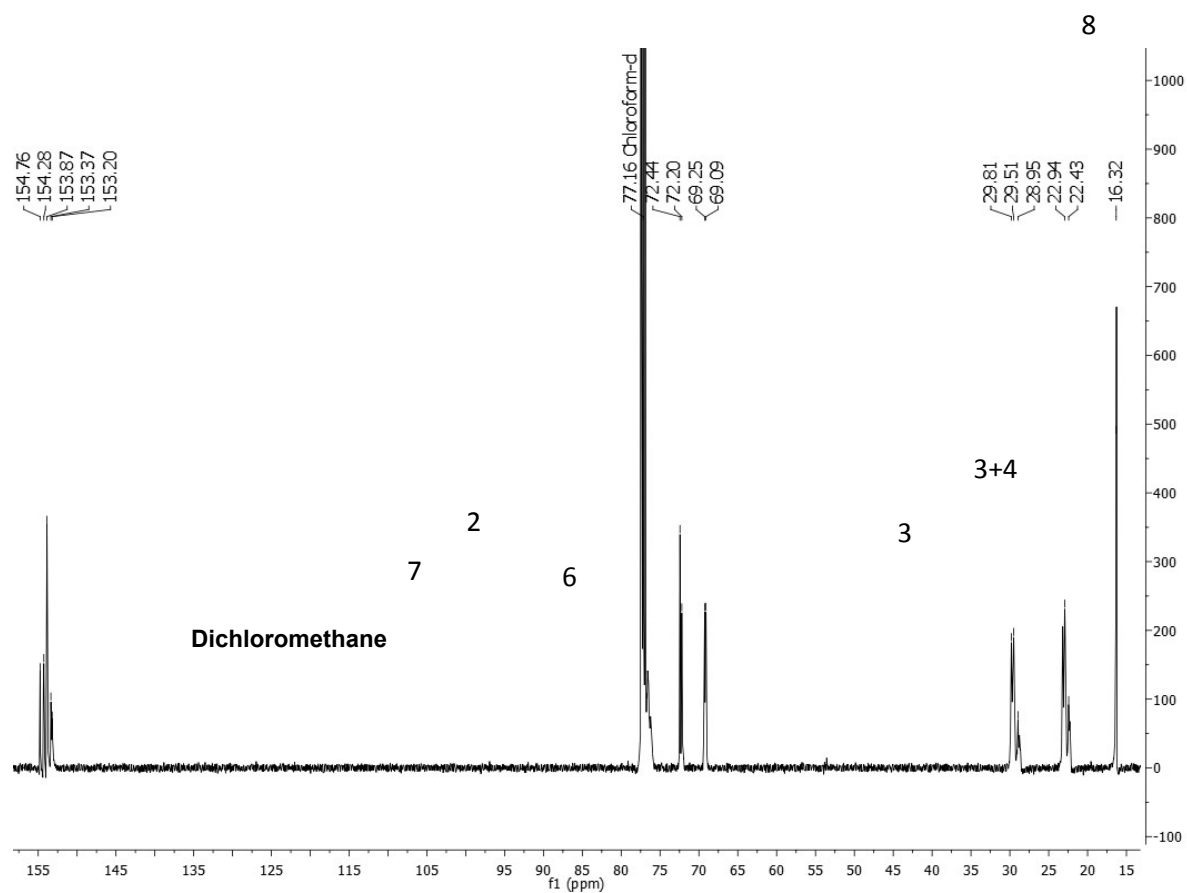

Figure S18. <sup>1</sup>H and <sup>13</sup>C NMR spectra of Terpolymer PCHC/PPC (precipitated), Table 1, Entry 11.

General  $^1\text{H}$  and  $^{13}\text{C}$  signal assignment for regioregular (*trans*-PLimC) and regioirregular (*trans*+*trans*\*+*cis*\*-PLimC).<sup>[6],[7]</sup>

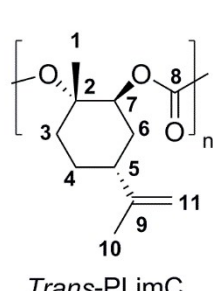

| Group | $^1\text{H}$ ( $\delta$ , ppm) | $^{13}\text{C}$ ( $\delta$ , ppm) |
|-------|--------------------------------|-----------------------------------|
| 1     | 1.69                           | 21.65                             |
| 2     | -                              | 81.97                             |
| 3     | 2.38, 2.40                     | 30.71                             |
| 4     | 1.34, 1.60                     | 25.90                             |
| 5     | 2.23                           | 37.55                             |
| 6     | 1.62, 1.86                     | 30.95                             |
| 7     | 5.04                           | 75.40                             |
| 8     | -                              | 152.06                            |
| 9     | -                              | 109.42                            |
| 10    | 1.50                           | 20.84                             |
| 11    | 4.70, 4.72                     | 148.76                            |

*Trans*-PLimC

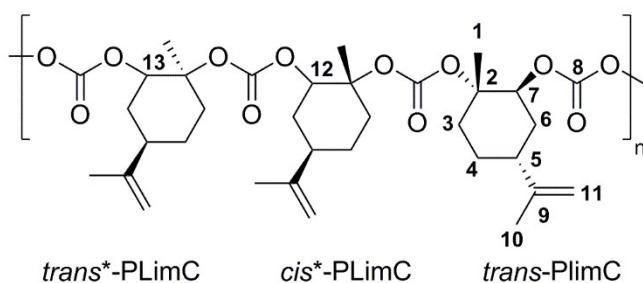

| Group | $^1\text{H}$ ( $\delta$ , ppm) | $^{13}\text{C}$ ( $\delta$ , ppm) |
|-------|--------------------------------|-----------------------------------|
| 1     | 1.69                           | 21.65                             |
| 2     | -                              | 81.97                             |
| 3     | 2.38, 2.40                     | 30.71                             |
| 4     | 1.34, 1.60                     | 25.90                             |
| 5     | 2.23                           | 37.55                             |
| 6     | 1.62, 1.86                     | 30.95                             |
| 7     | 5.04                           | 75.40                             |
| 8     | -                              | 152.06                            |
| 9     | -                              | 109.42                            |
| 10    | 1.50                           | 20.84                             |
| 11    | 4.70, 4.72                     | 148.76                            |
| 12    | 5.08                           | 152.43                            |
| 13    | 5.12                           | 153.77                            |

[6] C. M. Byrne, S. D. Allen, E. B. Lobkovsky and G. W. Coates, *J. Am. Chem. Soc.*, **2004**, 126, 11404-11405.

[7] L. Peña Carrodeguas, J. González-Fabra, F. Castro-Gómez, C. Bo and A. W. Kleij, *Chem.-Eur. J.*, **2015**, 21, 6115-6122.

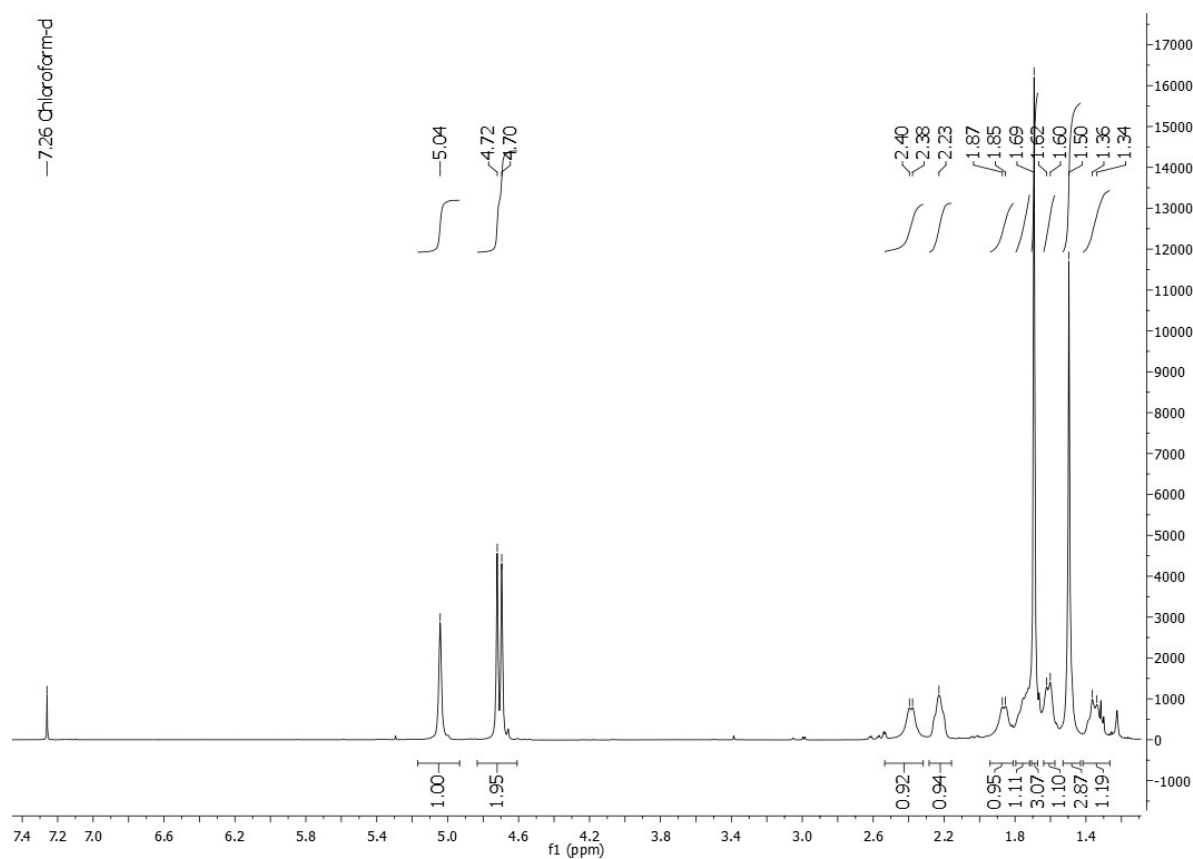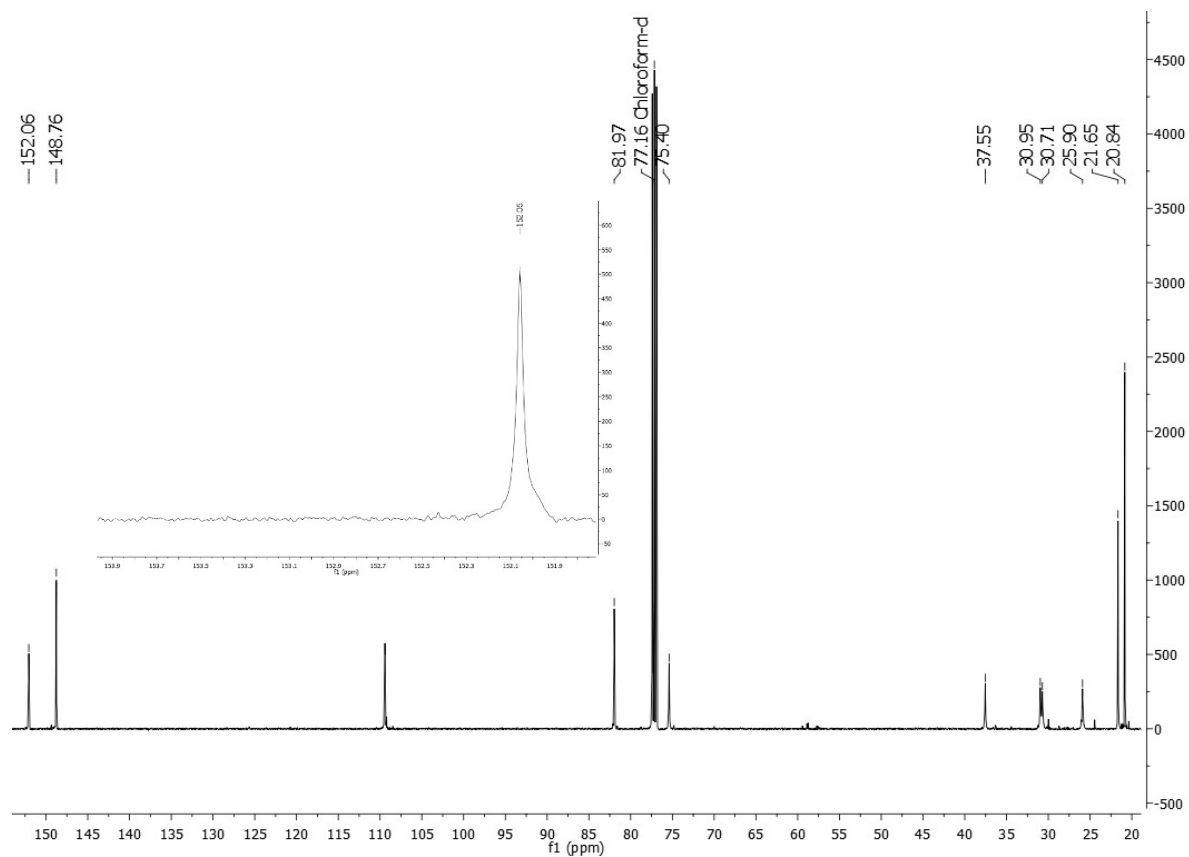

Figure S19. <sup>1</sup>H and <sup>13</sup>C NMR spectra of Poly(limonene carbonate), Table 3, Entry 1.

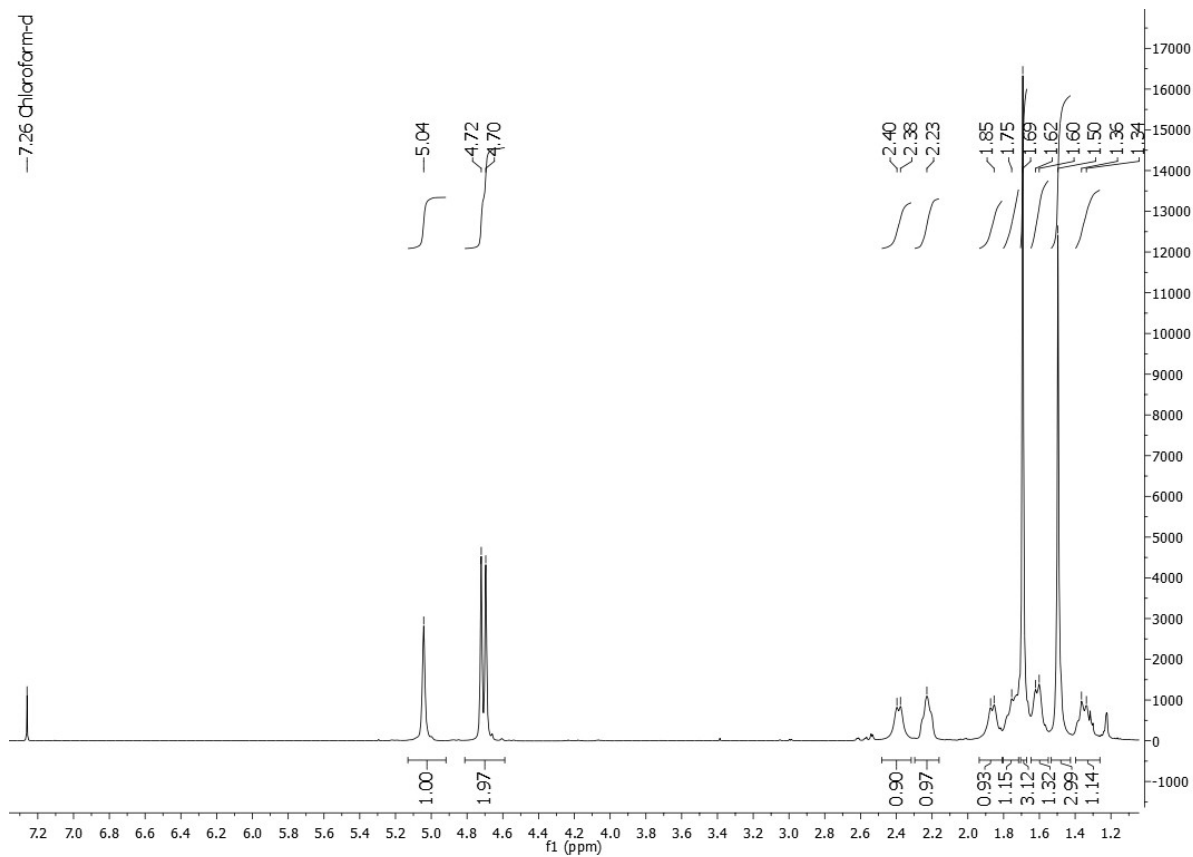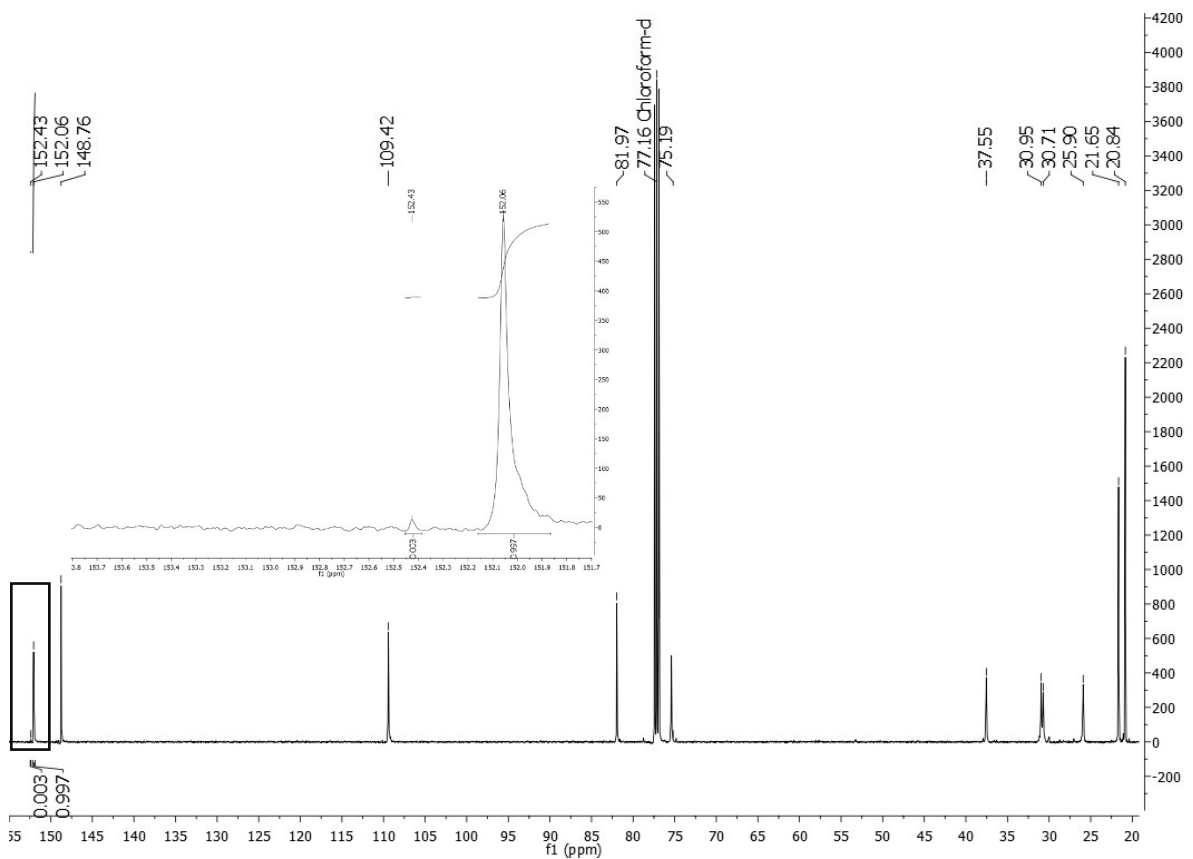

Figure S20.  $^1\text{H}$  and  $^{13}\text{C}$  NMR spectra of Poly(limonene carbonate), Table 3, Entry 2.

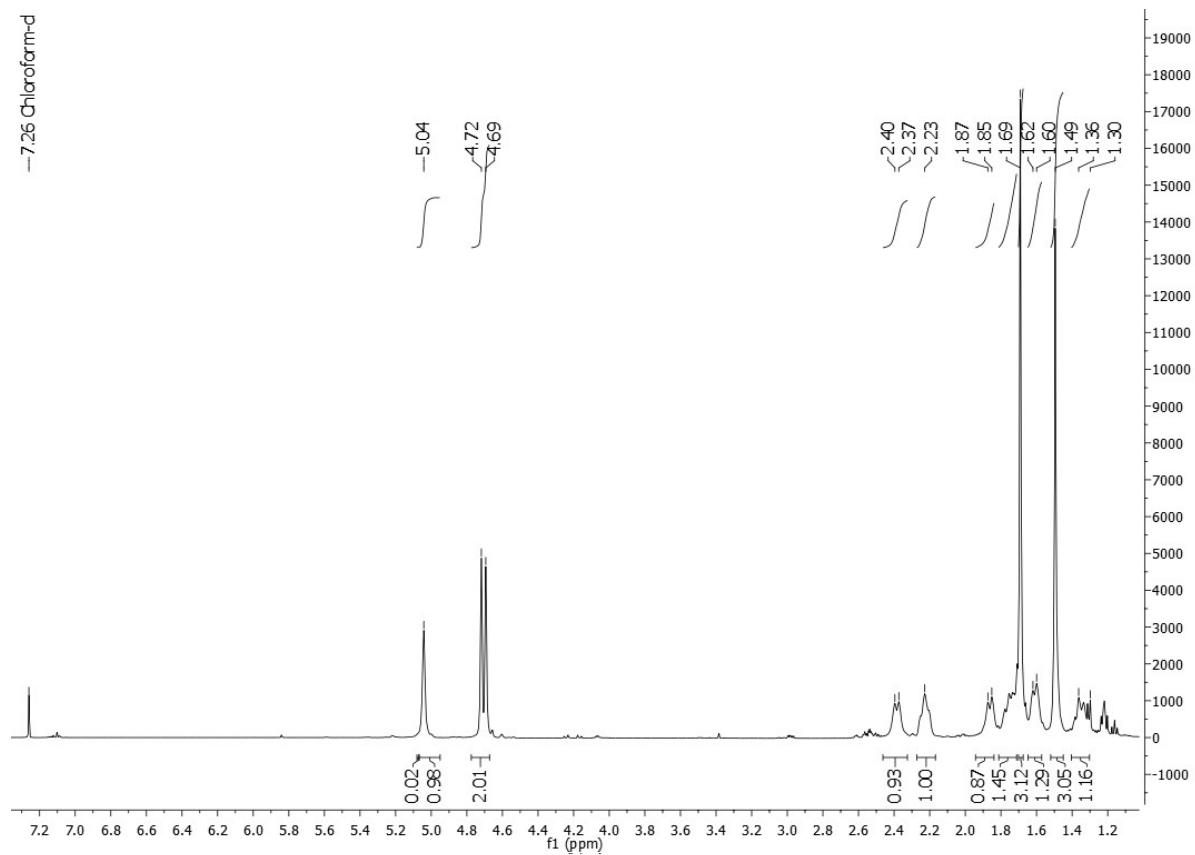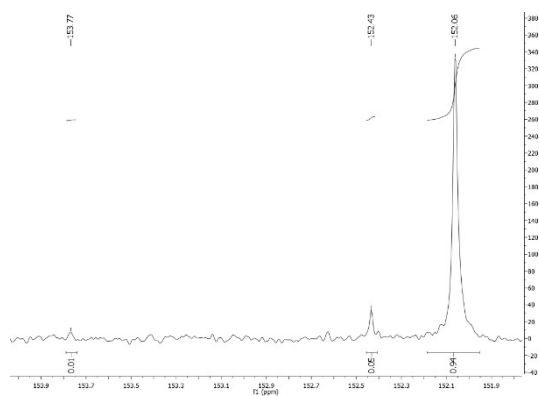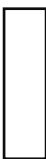



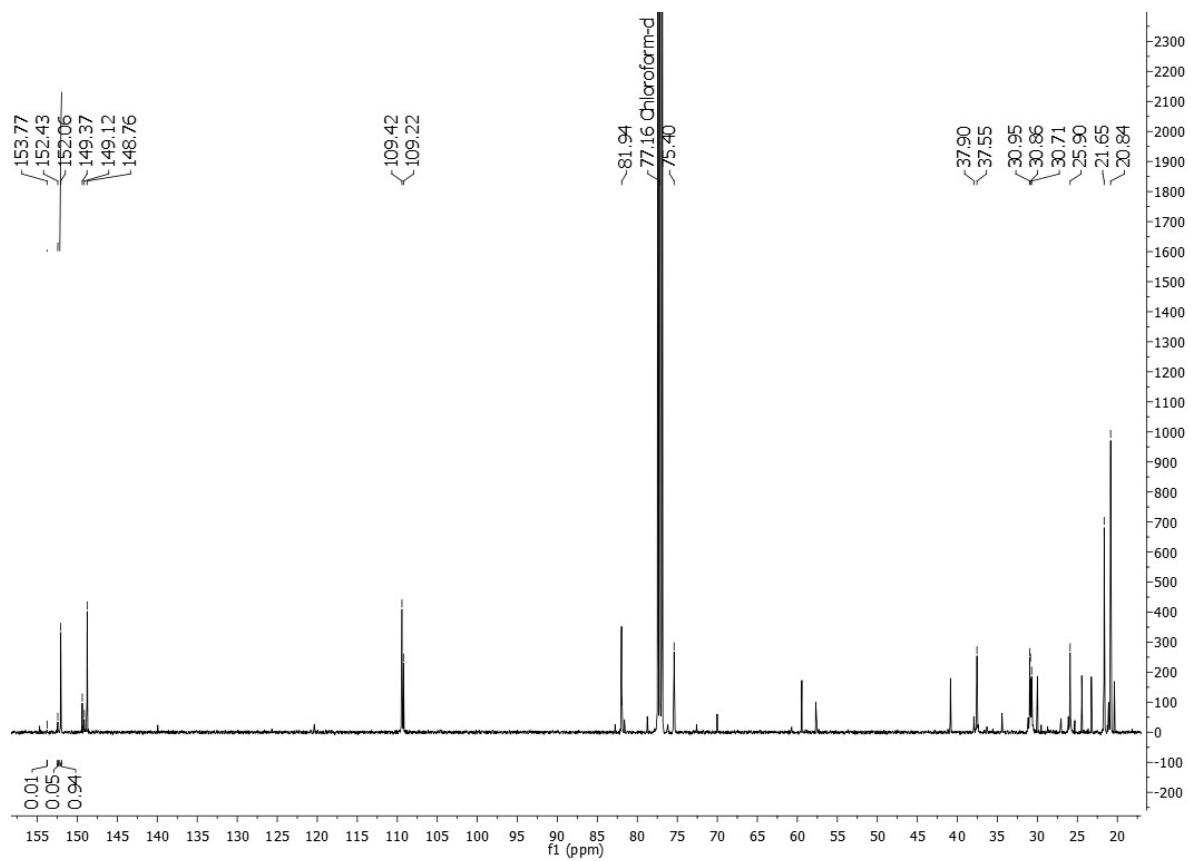

Figure S21.  $^1\text{H}$  and  $^{13}\text{C}$  NMR spectra of Poly(limonene carbonate), Table 3, Entry 3.

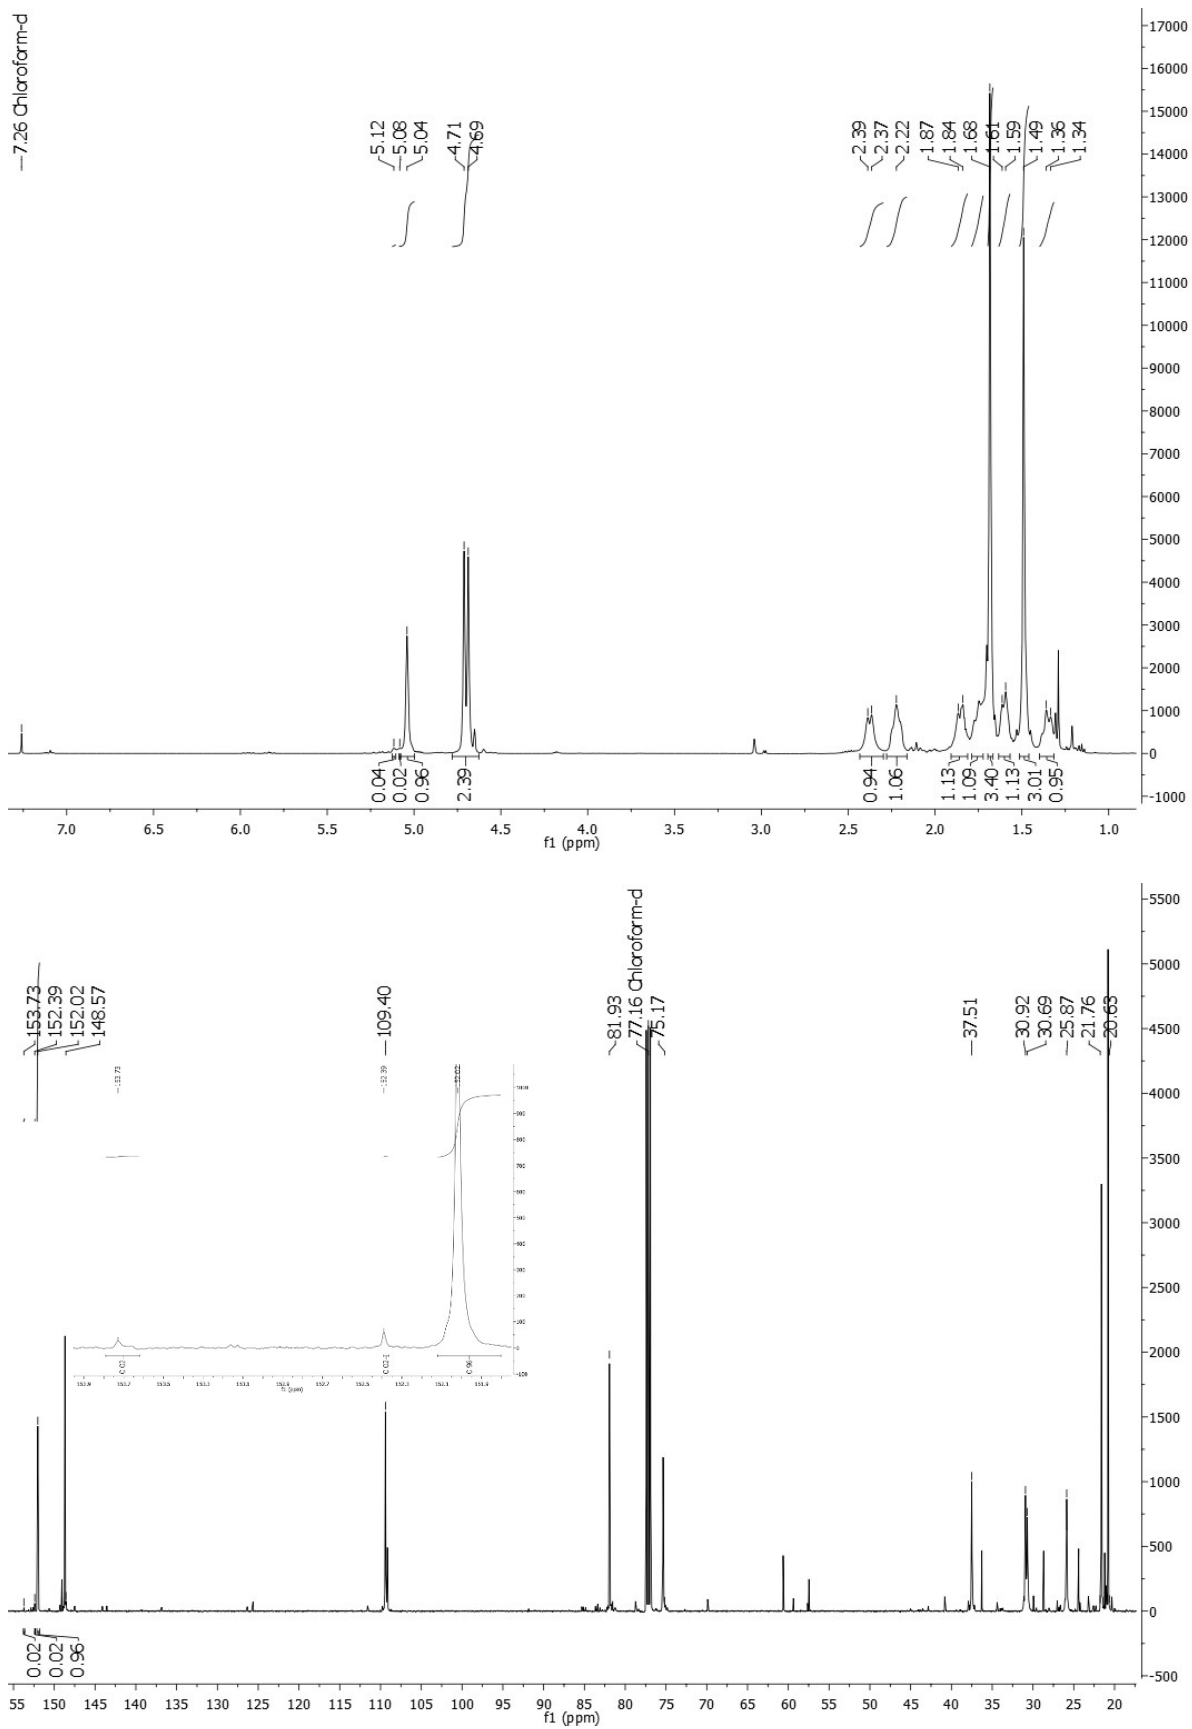

Figure S22. <sup>1</sup>H and <sup>13</sup>C NMR spectra of Poly(limonene carbonate), Table 3, Entry 4.

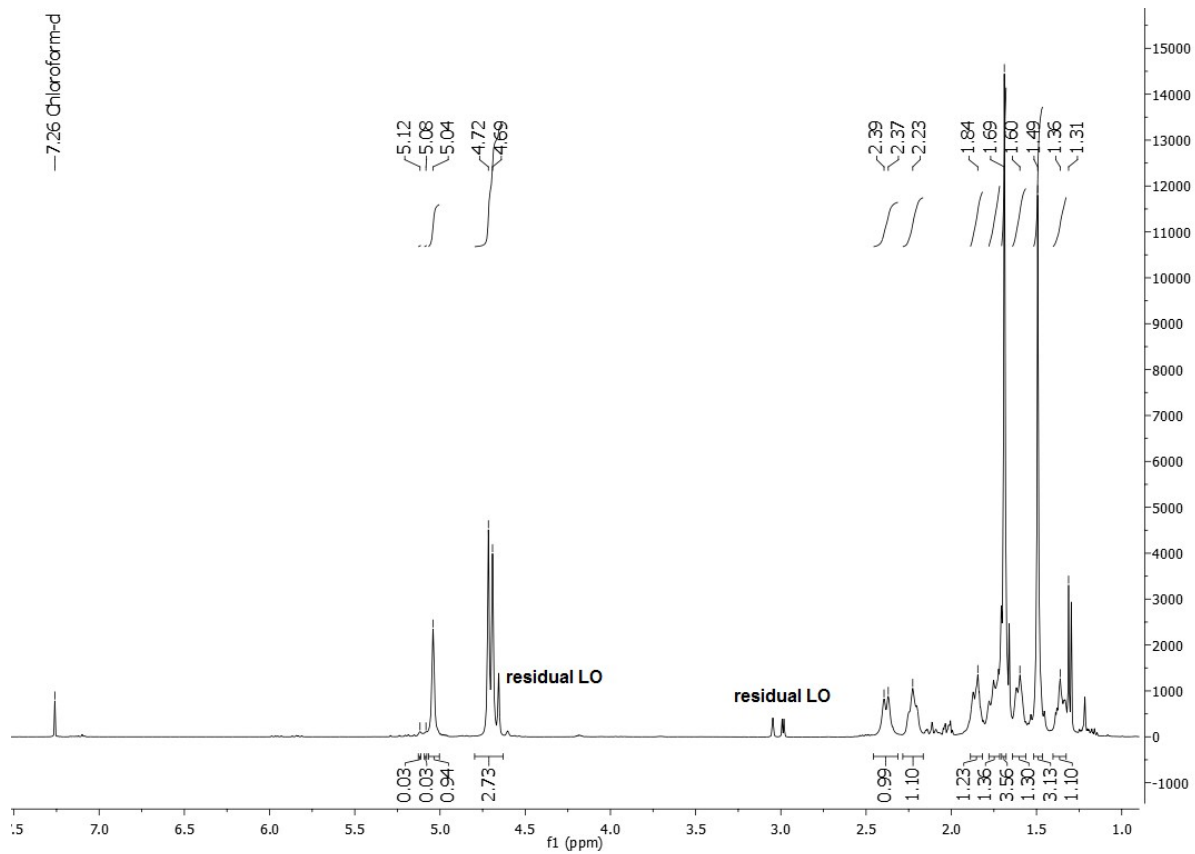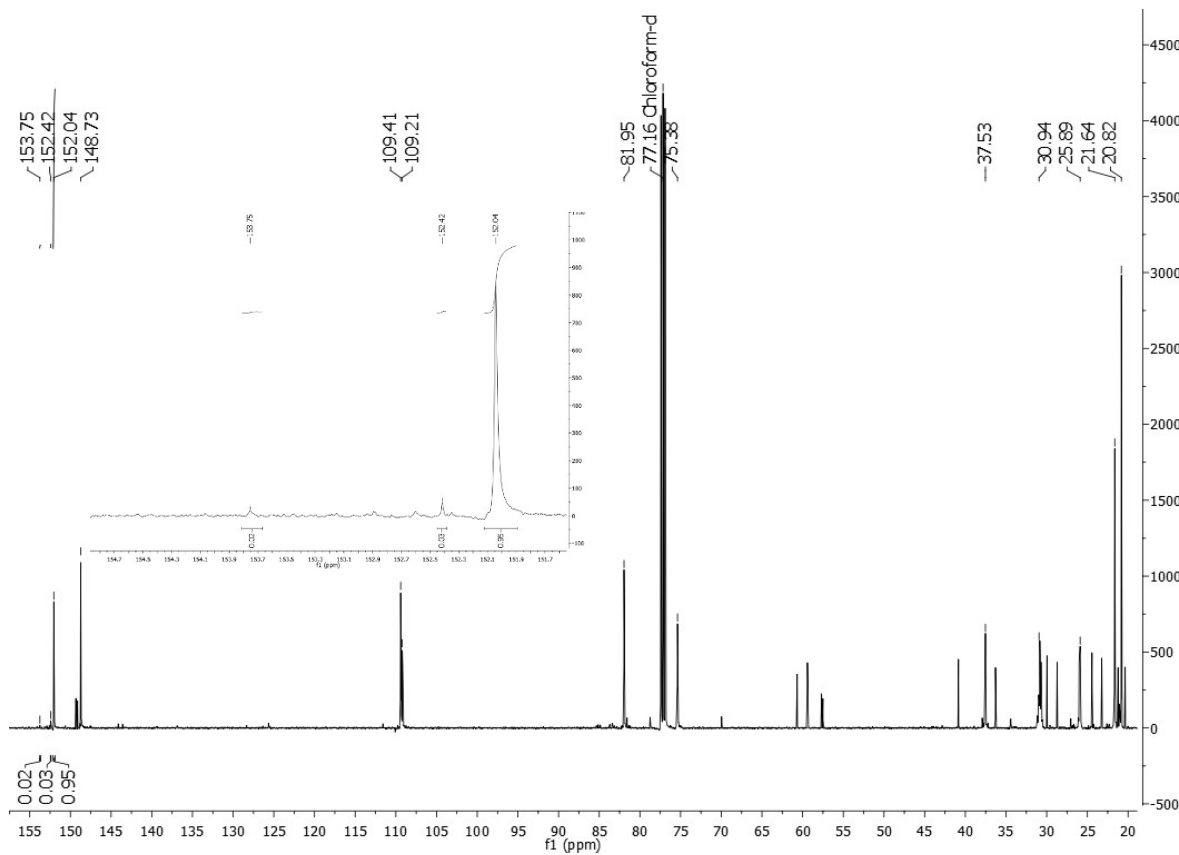

Figure S23. <sup>1</sup>H and <sup>13</sup>C NMR spectra of Poly(limonene carbonate), Table 3, Entry 5.

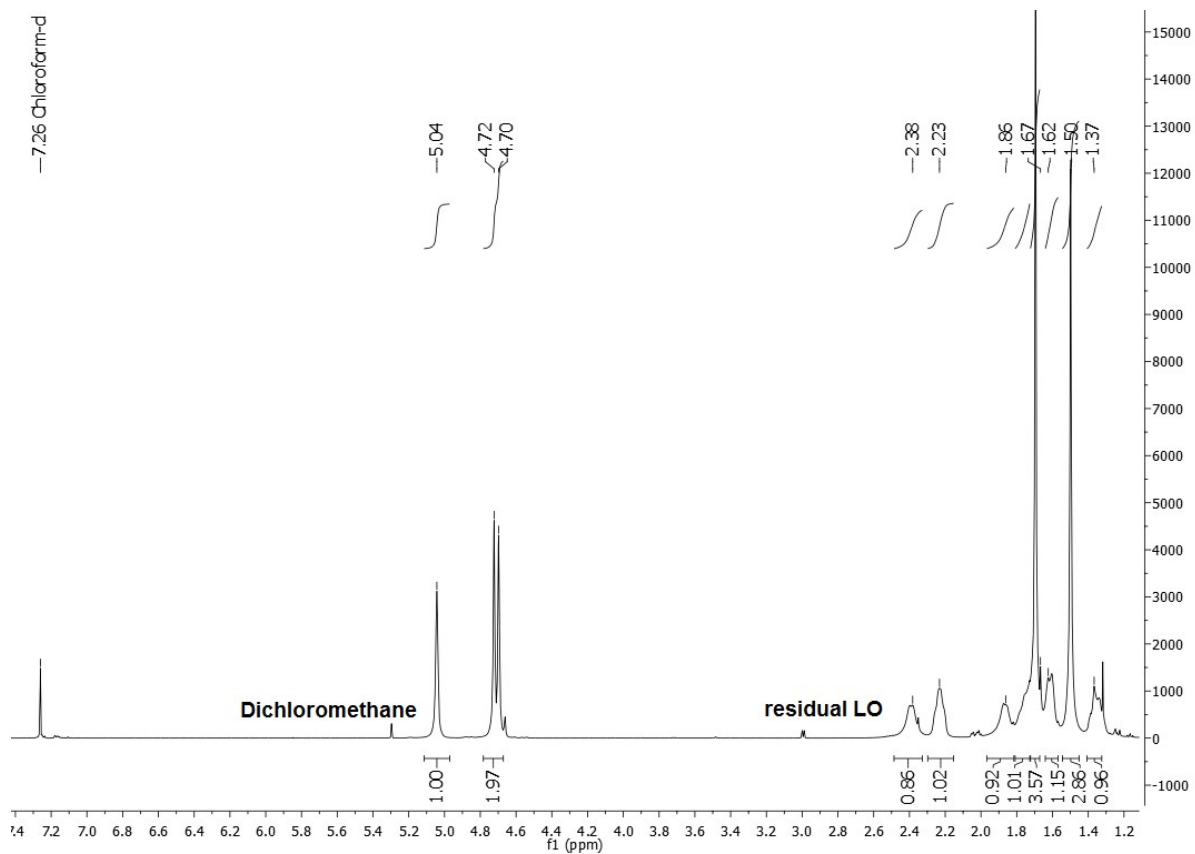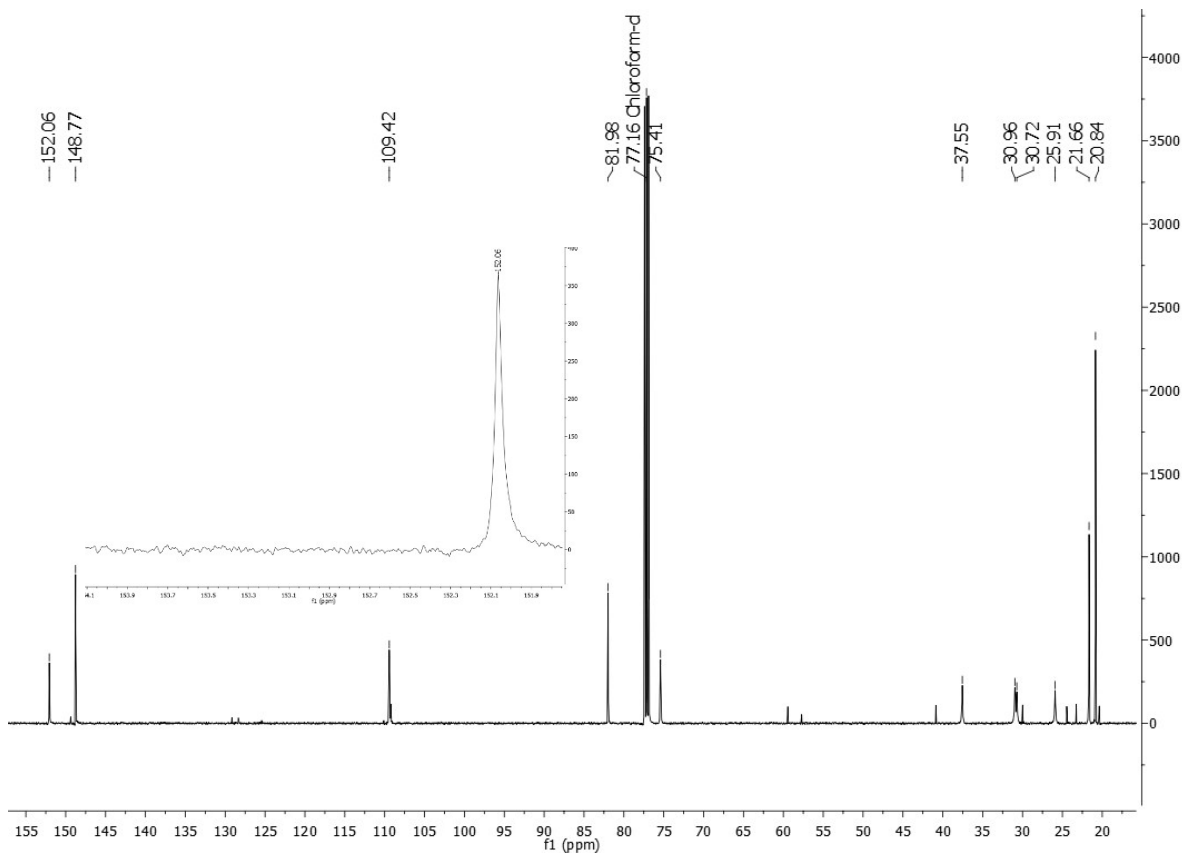

Figure S24. <sup>1</sup>H and <sup>13</sup>C NMR spectra of Poly(limonene carbonate), Table 3, Entry 6.

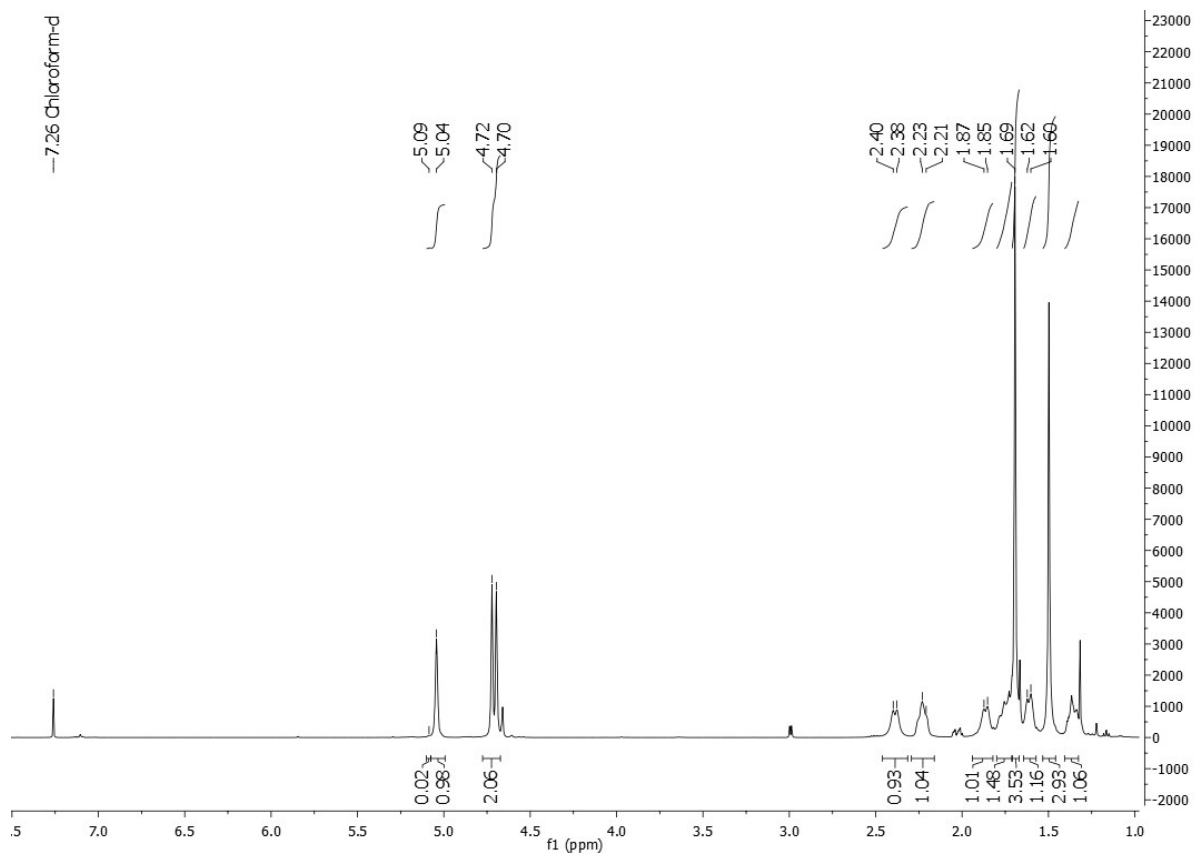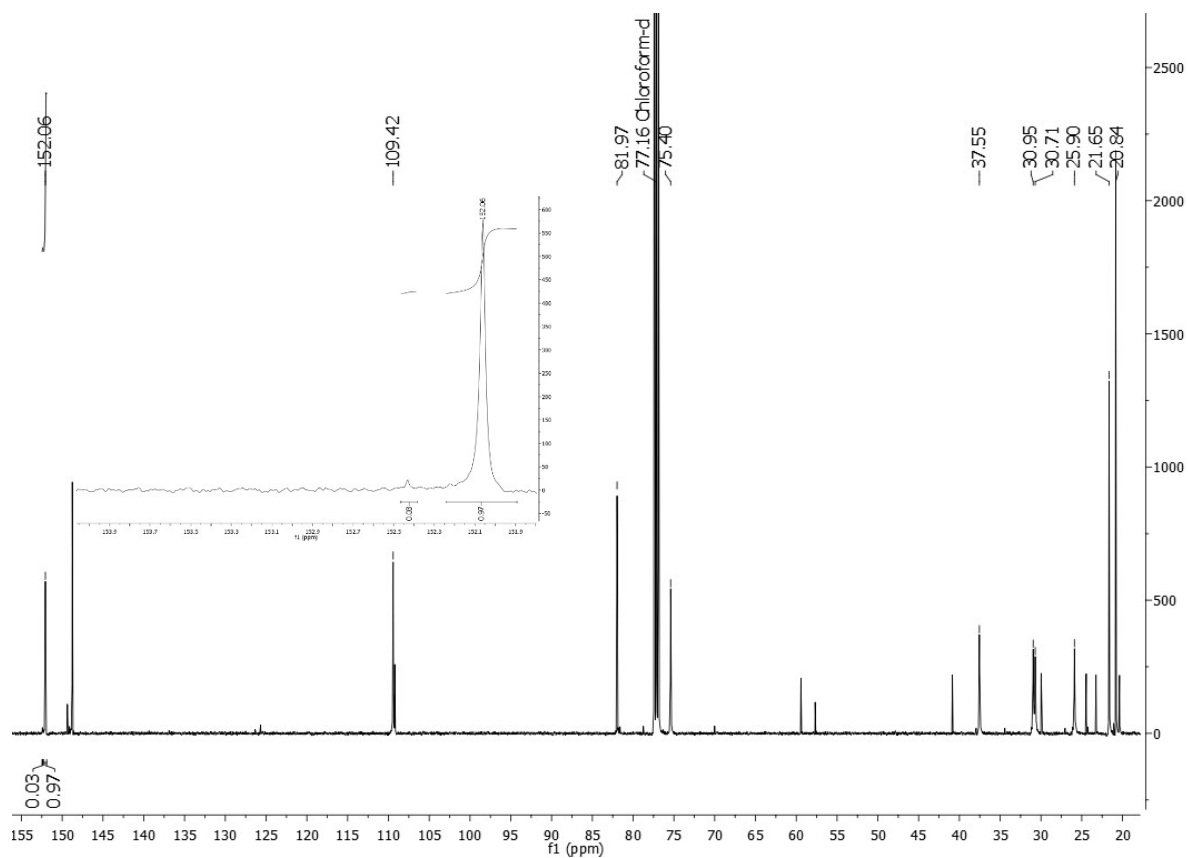

Figure S25. <sup>1</sup>H and <sup>13</sup>C NMR spectra of Poly(limonene carbonate), Table 3, Entry 7.

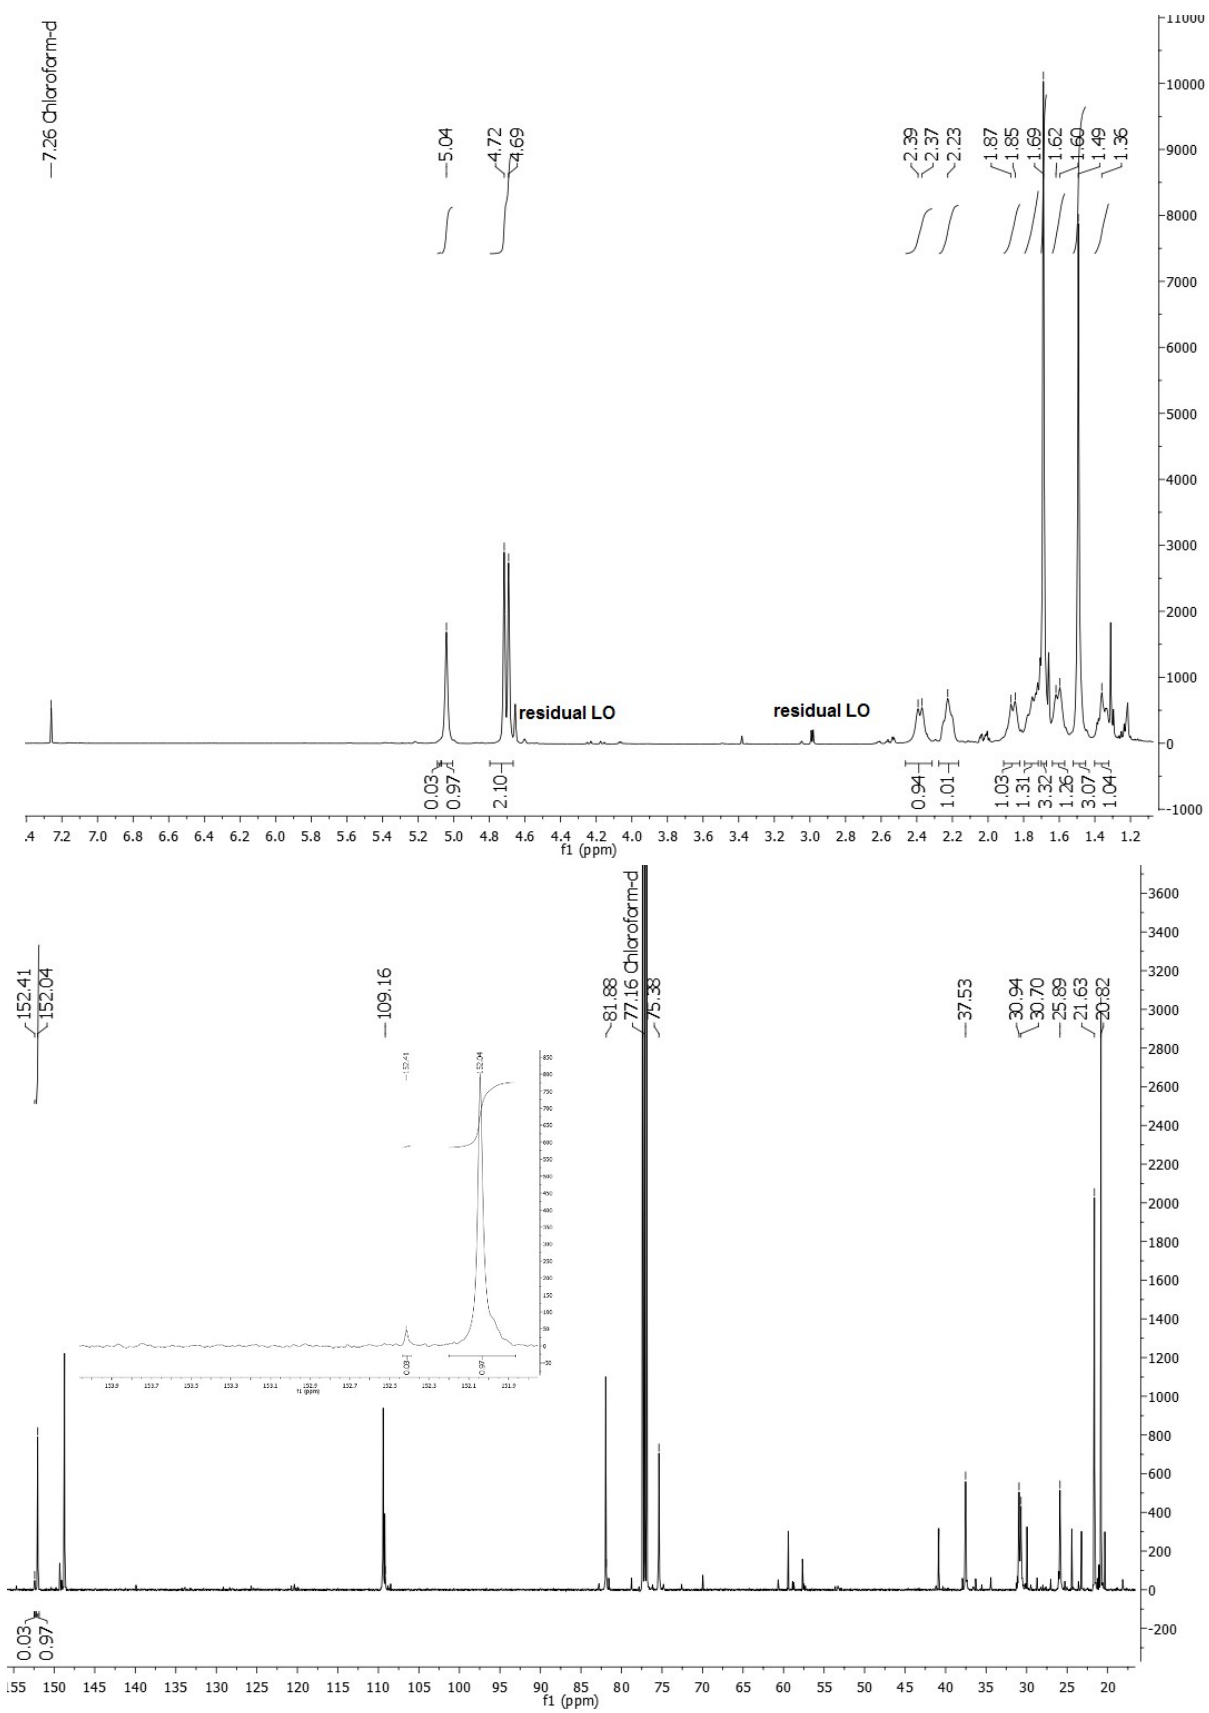

Figure S26. <sup>1</sup>H and <sup>13</sup>C NMR spectra of Poly(limonene carbonate), Table 3, Entry 8.

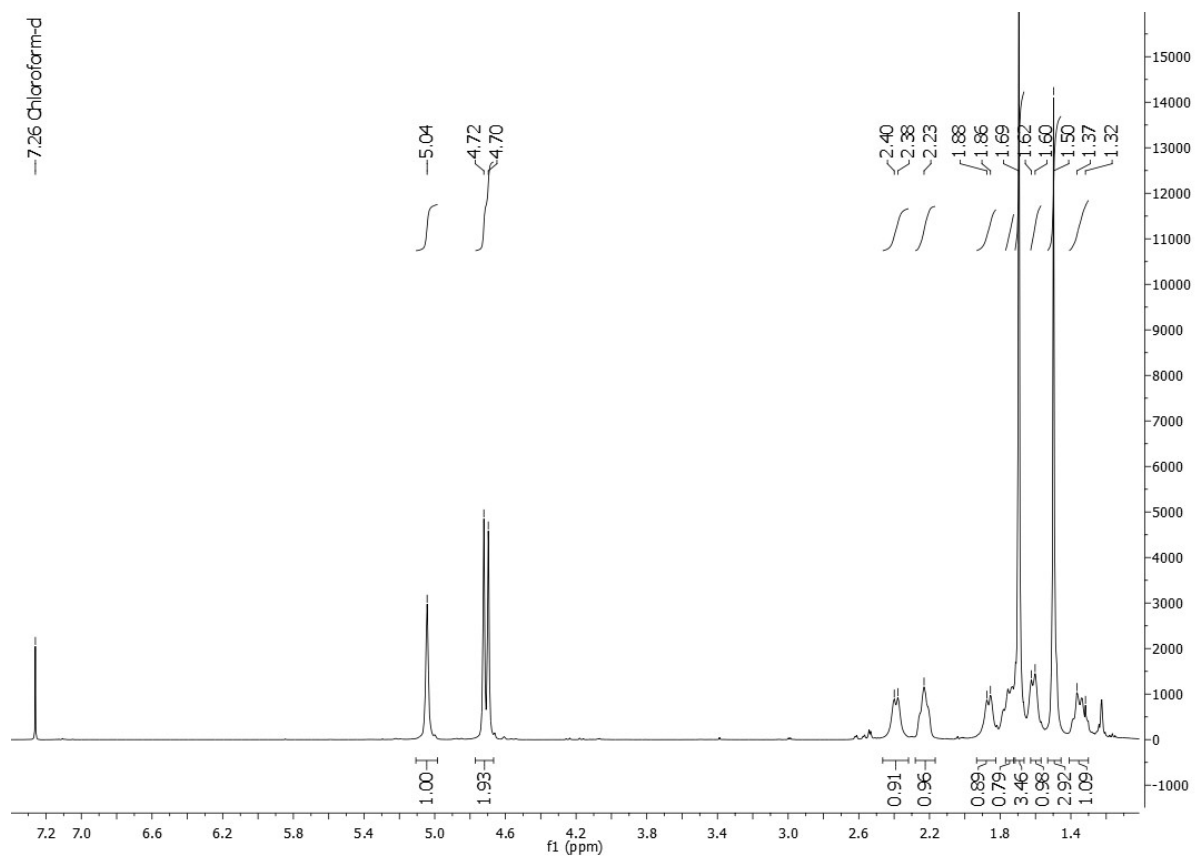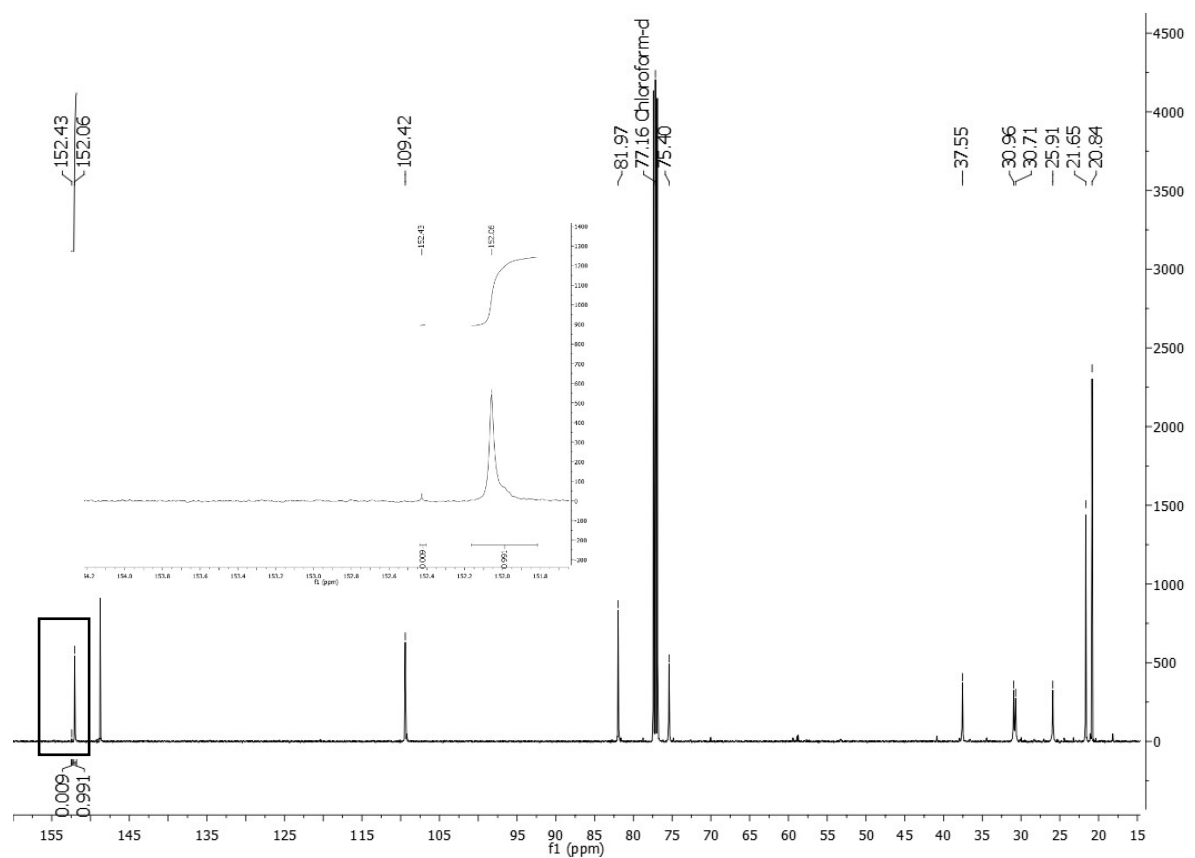

Figure S27. <sup>1</sup>H and <sup>13</sup>C NMR spectra of Poly(limonene carbonate), Table 3, Entry 9.

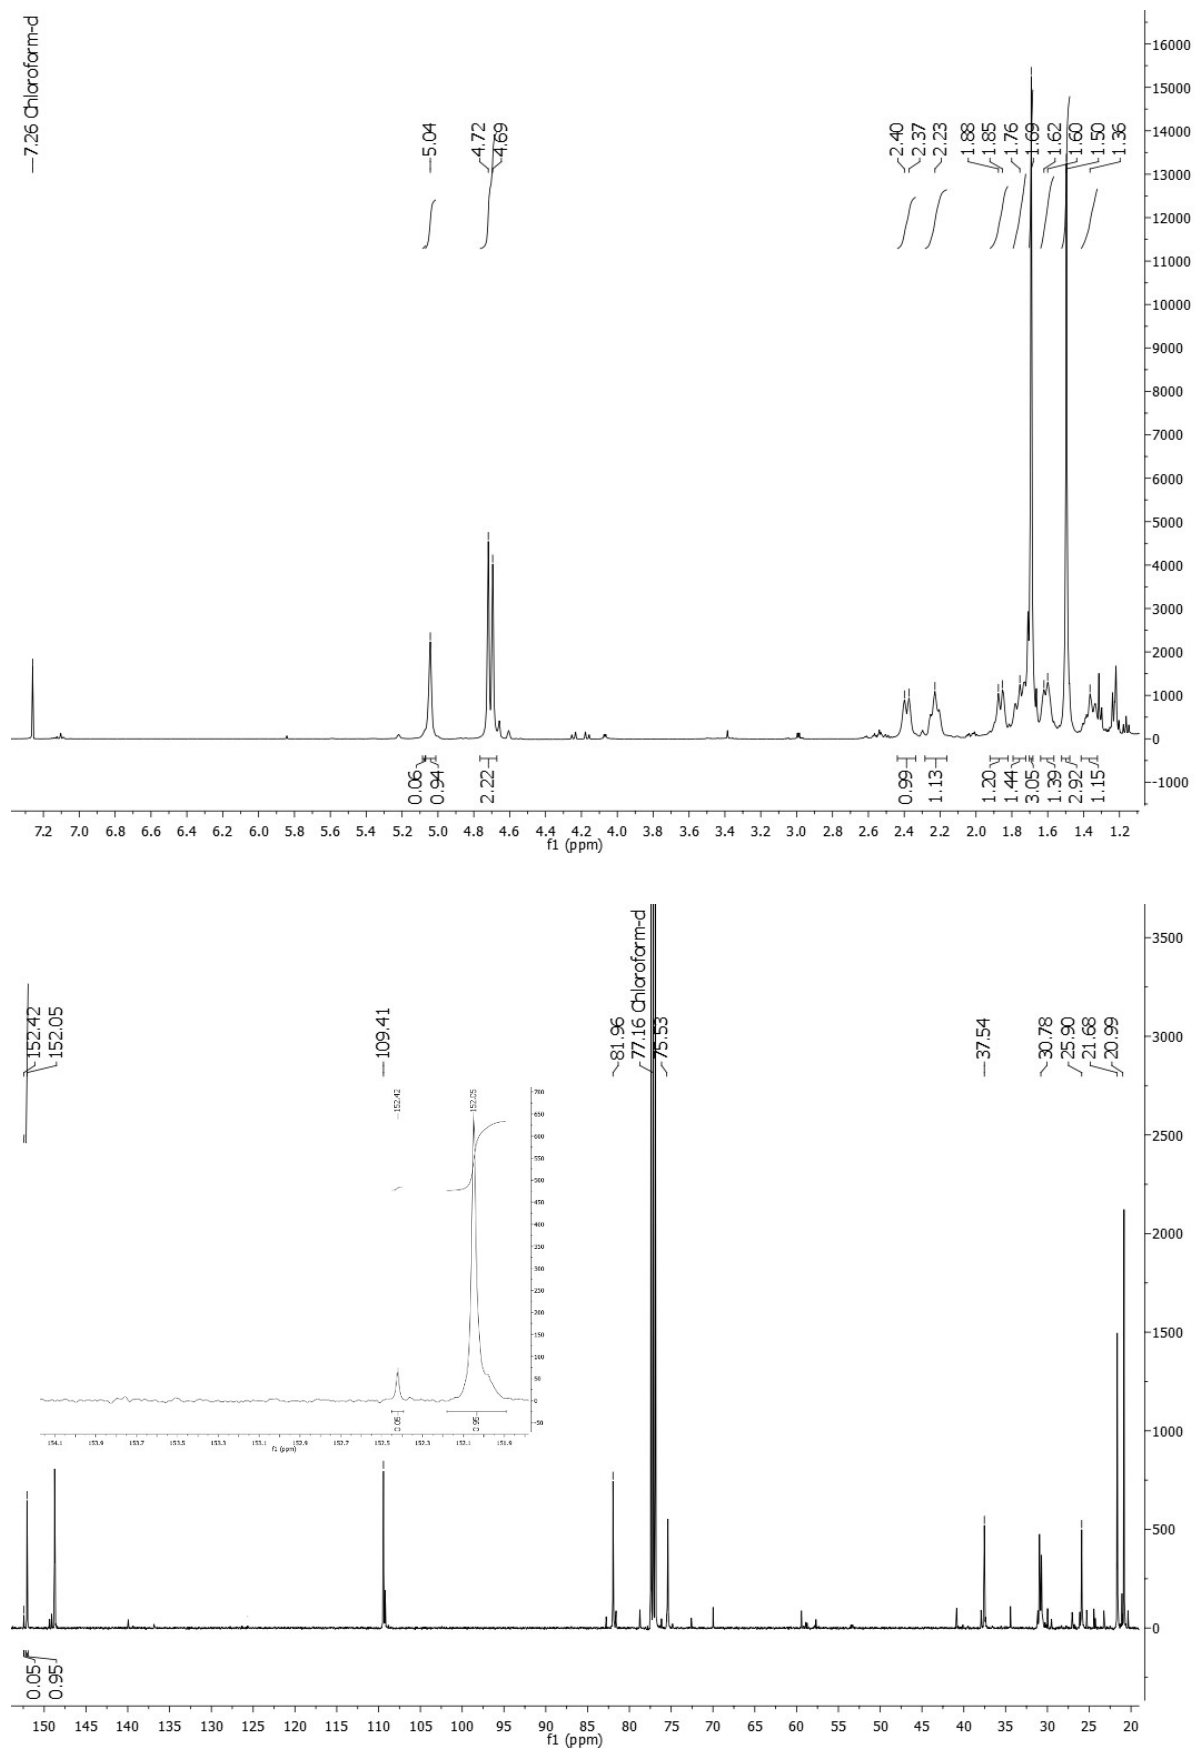

Figure S28. <sup>1</sup>H and <sup>13</sup>C NMR spectra of Poly(limonene carbonate), Table 3, Entry 10.



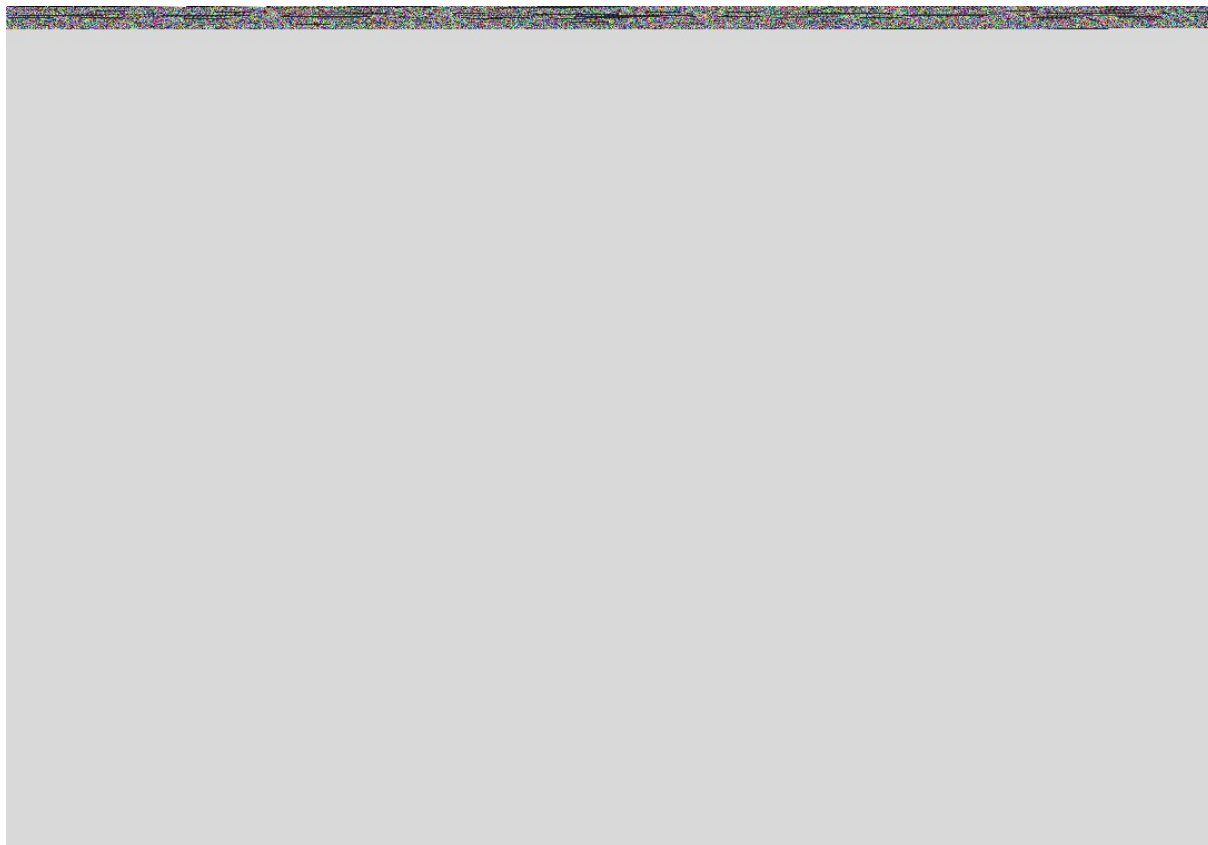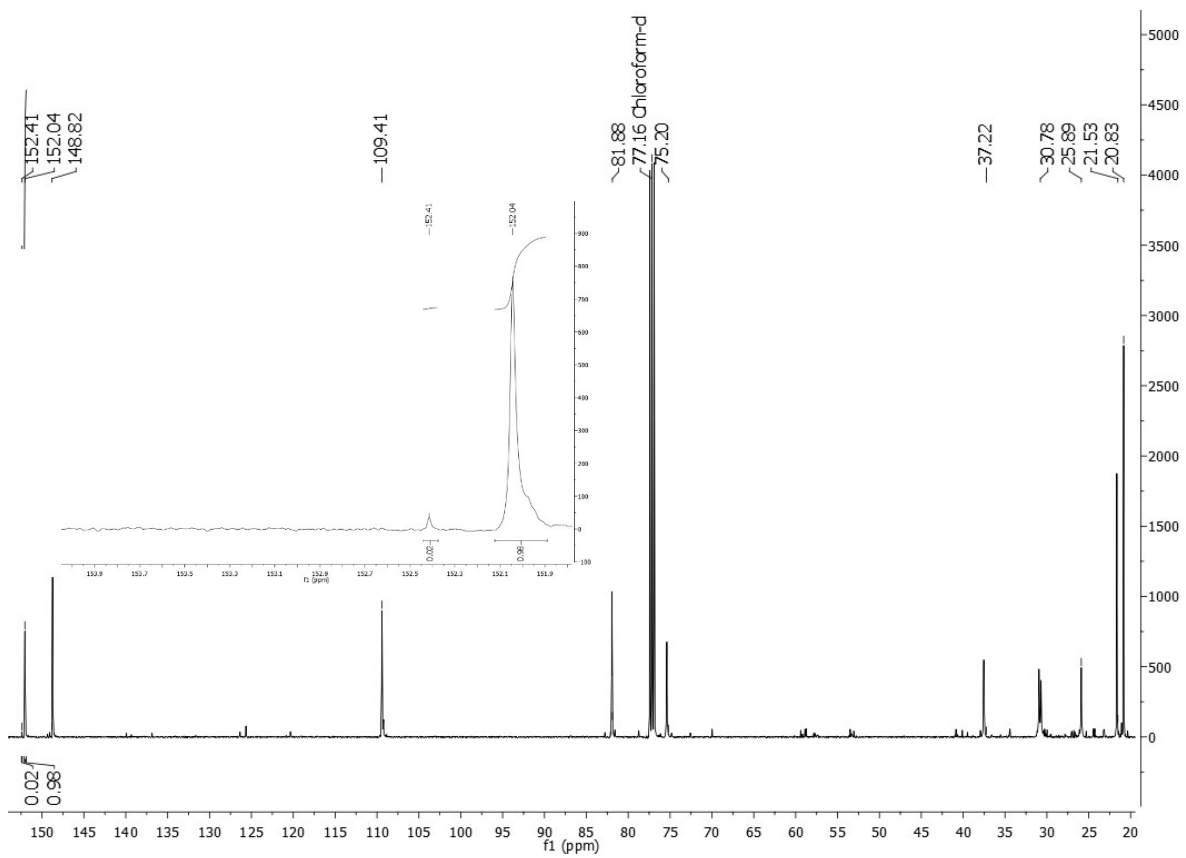

Figure S29.  $^1\text{H}$  and  $^{13}\text{C}$  NMR spectra of Poly(limonene carbonate), Table 3, Entry 13.

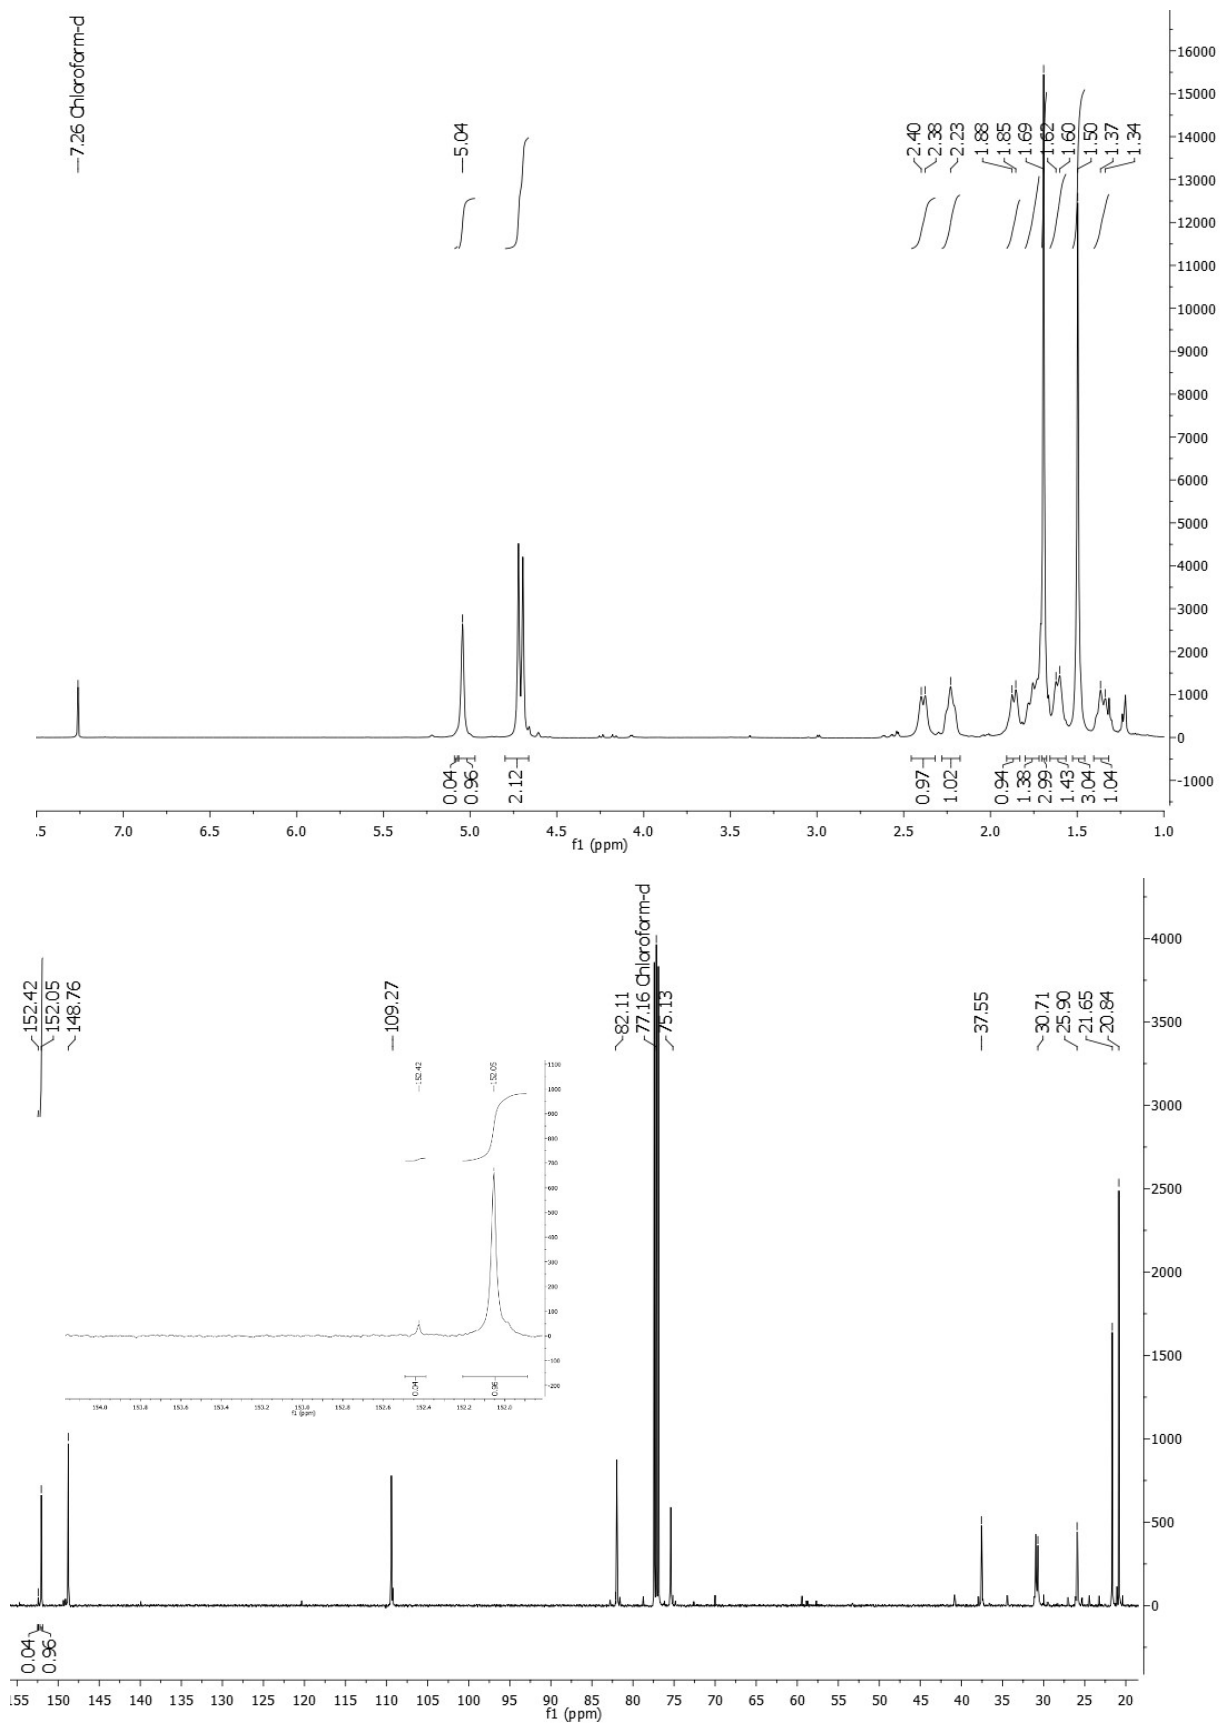

Figure S30. <sup>1</sup>H and <sup>13</sup>C NMR spectra of Poly(limonene carbonate), Table 3, Entry 14.

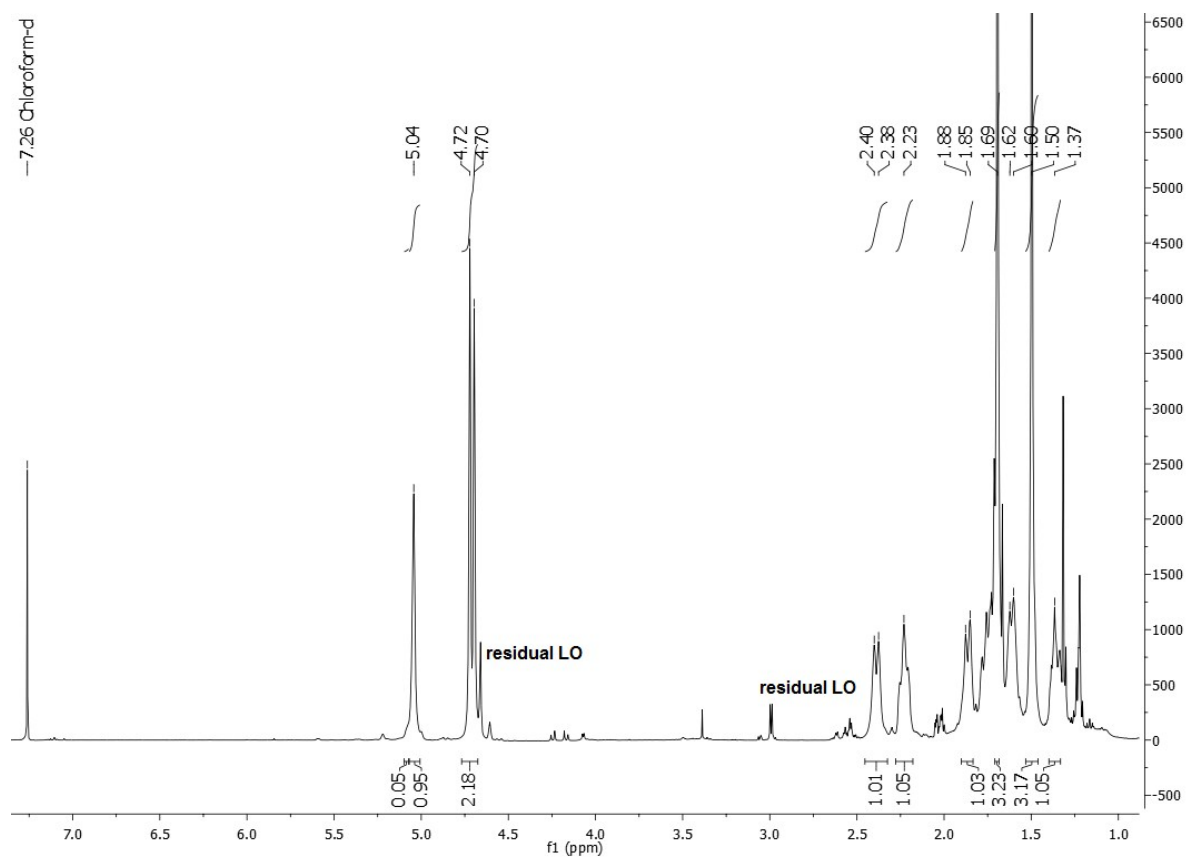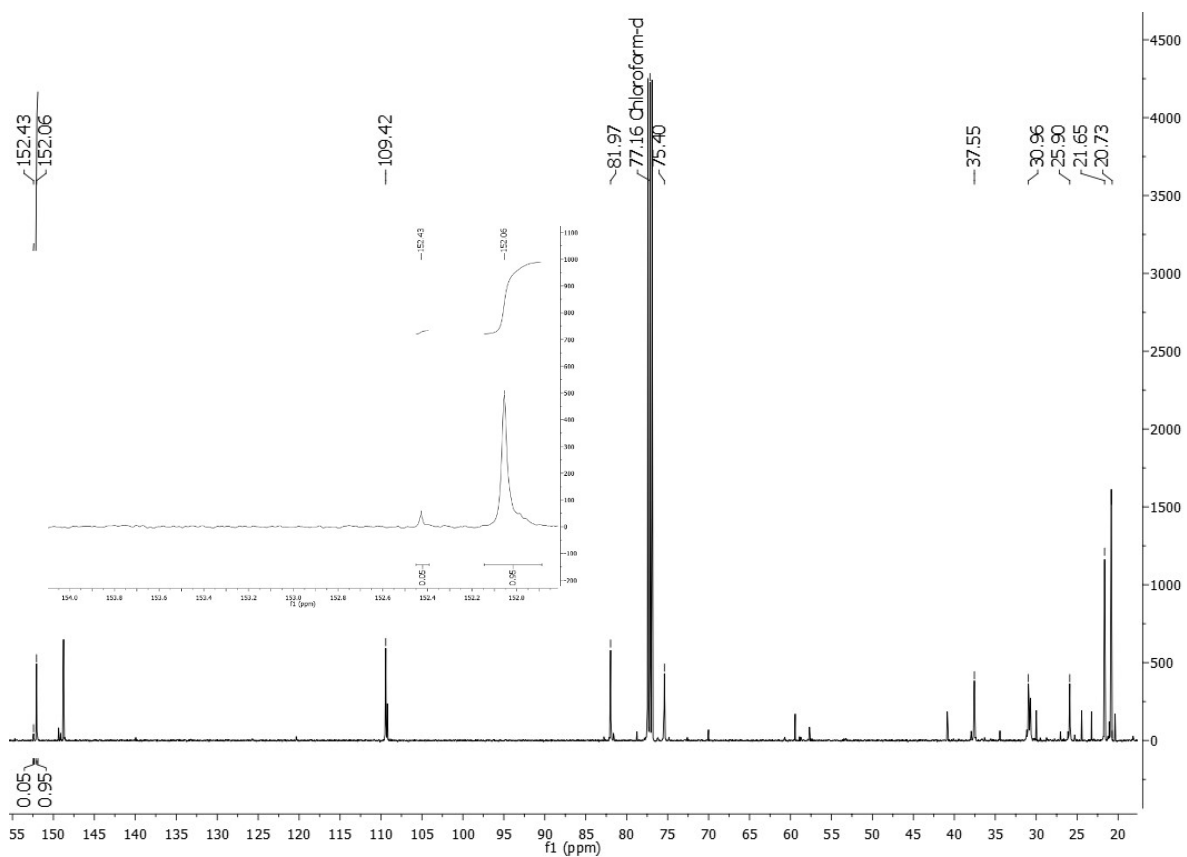

Figure S31. <sup>1</sup>H and <sup>13</sup>C NMR spectra of Poly(limonene carbonate), Table 3, Entry 15.

## 10. Single Crystal X-Ray Determination

### General

Data were collected on a single crystal X-ray diffractometer equipped with a CCD detector (APEX II,  $\kappa$ -CCD), a fine-focus sealed tube with MoK $\alpha$  radiation ( $\lambda = 0.71073 \text{ \AA}$ ) and a Triumph monochromator using the APEX II software package (1) or with a CMOS detector (APEX III,  $\kappa$ -CMOS), an IMS microsource with MoK $\alpha$  radiation ( $\lambda = 0.71073 \text{ \AA}$ ) and a Helios optic using the APEX III software package (2).<sup>[1,2]</sup> The crystals were fixed on the top of a kapton micro sampler with perfluorinated ether, transferred to the diffractometer and frozen under a stream of cold nitrogen. A matrix scan was used to determine the initial lattice parameters. Reflections were merged and corrected for Lorentz and polarization effects, scan speed, and background using SAINT.<sup>[3]</sup> Absorption corrections, including odd and even ordered spherical harmonics were performed using SADABS.<sup>[3]</sup> Space group assignments were based upon systematic absences,  $E$  statistics, and successful refinement of the structures. Structures were solved using SHELXT with the aid of successive difference Fourier maps, and were refined against all data using the APEX III software in conjunction SHELXL-2014 and SHELXL.<sup>[4]</sup> [2] [5] [6] Hydrogen atoms were calculated in ideal positions as follows: Methyl hydrogen atoms were refined as part of rigid rotating groups, with a C–H distance of 0.98 Å and  $U_{\text{iso(H)}} = 1.5 \cdot U_{\text{eq(C)}}$ . Other H atoms were placed in calculated positions and refined using a riding model with methylene and aromatic C–H distances of 0.99 Å and 0.95 Å, respectively, other C–H distances of 1.00 Å and  $U_{\text{iso(H)}} = 1.2 \cdot U_{\text{eq(C)}}$ . Non-hydrogen atoms were refined with anisotropic displacement parameters. Full-matrix least-squares refinements were carried out by minimizing  $\sum w(F_o^2 - F_c^2)^2$  with the SHELXL-97 weighting scheme.<sup>[5]</sup> Neutral atom scattering factors for all atoms and anomalous dispersion corrections for the non-hydrogen atoms were taken from *International Tables for Crystallography*.<sup>[7]</sup> 2 contains four disordered molecules of toluene in the unit cell which were treated as a diffuse contribution to the overall scattering without specific atom positions using the PLATON/SQUEEZE procedure.<sup>[8]</sup> Images were created with PLATON.<sup>[9]</sup>

### References

- [1] Bruker, *APEX suite of crystallographic software, APEX 2 Version 2014-9.0*, Bruker AXS Inc., Madison, Wisconsin, USA, **2014**.
- [2] Bruker, *APEX suite of crystallographic software, APEX 3 Version 2015-5.2*, Bruker AXS Inc., Madison, Wisconsin, USA, **2015**.
- [3] Bruker, *SAINT, Version 8.34A and SADABS, Version 2014/5*, Bruker AXS Inc., Madison, Wisconsin, USA, **2014**.
- [4] G. M. Sheldrick, *Acta Cryst. A* **2015**, *71*, 3–8.
- [5] G. M. Sheldrick, *Acta Cryst. C* **2015**, *71*, 3–8.
- [6] C. B. Hübschle, G. M. Sheldrick, B. Dittrich, *J. Appl. Cryst.* **2011**, *44*, 1281–1284.
- [7] A. J. C. Wilson (Ed.) *International Tables for Crystallography, Vol. C, Tables 6.1.1.4 (pp. 500-502), 4.2.6.8 (pp. 219-222), and 4.2.4.2 (pp. 193-199)*, Kluwer Academic Publishers, Dordrecht, The Netherlands, **1992**.
- [8] A. L. Spek, *Acta Cryst. C* **2015**, *71*, 9–18.
- [9] A. L. Spek, *Acta Cryst. D* **2009**, *65*, 148-155.

## Compound 1 (CCDC 1508590)

Diffraction operator C. Jandl  
scanspeed 10 s per frame  
dx 80 mm  
7296 frames measured in 21 data sets  
phi-scans with delta\_phi = 0.5  
omega-scans with delta\_omega = 0.5

### Crystal data

|                                                                               |                                                         |
|-------------------------------------------------------------------------------|---------------------------------------------------------|
| <u>C<sub>31</sub>H<sub>45</sub>F<sub>6</sub>N<sub>3</sub>Si<sub>2</sub>Zn</u> | $F(000) = 728$                                          |
| $M_r = 695.27$                                                                |                                                         |
| Triclinic, <u>P</u> -1                                                        | $D_x = 1.325 \text{ Mg m}^{-3}$                         |
| Hall symbol: <u>-P</u> 1                                                      | Melting point: ? K                                      |
| $a = 10.5225 (11) \text{ \AA}$                                                | Mo $K\alpha$ radiation, $\lambda = 0.71073 \text{ \AA}$ |
| $b = 11.8495 (13) \text{ \AA}$                                                | Cell parameters from <u>9867</u> reflections            |
| $c = 16.4988 (18) \text{ \AA}$                                                | $\theta = 2.2\text{--}28.3^\circ$                       |
| $\alpha = 91.643 (5)^\circ$                                                   | $\mu = 0.83 \text{ mm}^{-1}$                            |
| $\beta = 107.641 (5)^\circ$                                                   | $T = 100 \text{ K}$                                     |
| $\gamma = 115.266 (4)^\circ$                                                  | Fragment, yellow                                        |
| $V = 1742.8 (3) \text{ \AA}^3$                                                | $0.44 \times 0.26 \times 0.23 \text{ mm}$               |
| $Z = 2$                                                                       |                                                         |

### Data collection

|                                                                      |                                                                        |
|----------------------------------------------------------------------|------------------------------------------------------------------------|
| <u>Apex II CCD diffractometer</u>                                    | <u>7111</u> independent reflections                                    |
| Radiation source: <u>fine-focus sealed tube</u>                      | <u>6403</u> reflections with $I > 2\sigma(I)$                          |
| <u>Triumph monochromator</u>                                         | $R_{\text{int}} = 0.030$                                               |
| Detector resolution: <u>16</u> pixels $\text{mm}^{-1}$               | $\theta_{\text{max}} = 26.4^\circ$ , $\theta_{\text{min}} = 1.9^\circ$ |
| <u>phi- and omega-rotation scans</u>                                 | $h = -13 \text{ } 13$                                                  |
| Absorption correction: <u>multi-scan SADABS 2014/5, Bruker, 2014</u> | $k = -14 \text{ } 14$                                                  |
| $T_{\text{min}} = 0.673$ , $T_{\text{max}} = 0.746$                  | $l = -20 \text{ } 20$                                                  |
| <u>41885</u> measured reflections                                    |                                                                        |

### Refinement

Refinement on  $F^2$

Least-squares matrix: full

$R[F^2 > 2\sigma(F^2)] = \underline{0.036}$

$wR(F^2) = \underline{0.099}$

$S = \underline{1.05}$

7111 reflections

398 parameters

0 restraints

0 constraints

Primary atom site location: intrinsic phasing

Secondary atom site location: difference Fourier map

Hydrogen site location: inferred from neighbouring sites

H-atom parameters constrained

$W = 1/[\Sigma^2(FO^2) + (0.0479P)^2 + 2.1134P]$   
WHERE  $P = (FO^2 + 2FC^2)/3$

$(\Delta/\sigma)_{\max} = \underline{0.001}$

$\Delta\rho_{\max} = \underline{1.21} \text{ e } \text{\AA}^{-3}$

$\Delta\rho_{\min} = \underline{-0.39} \text{ e } \text{\AA}^{-3}$

Extinction correction: none

Extinction coefficient: -

## Compound 2 (CCDC 1508589)

Diffractometer operator C. Jandl  
scanspeed 10 s per frame  
dx 50 mm  
3249 frames measured in 7 data sets  
phi-scans with delta\_phi = 0.5  
omega-scans with delta\_omega = 0.5  
shutterless mode

### Crystal data

|                                                                                                         |                                                                           |
|---------------------------------------------------------------------------------------------------------|---------------------------------------------------------------------------|
| <u>C<sub>56</sub>H<sub>72</sub>F<sub>12</sub>N<sub>4</sub>O<sub>2</sub>Si<sub>2</sub>Zn<sub>2</sub></u> |                                                                           |
| $M_r = 1248.14$                                                                                         | $D_x = 1.200 \text{ Mg m}^{-3}$                                           |
| <u>Monoclinic, <math>P2_1/c</math></u>                                                                  | Melting point: ? K                                                        |
| Hall symbol: <u>-P 2ybc</u>                                                                             | <u>Mo K<math>\alpha</math></u> radiation, $\lambda = 0.71073 \text{ \AA}$ |
| $a = 11.3281 (6) \text{ \AA}$                                                                           | Cell parameters from <u>9241</u> reflections                              |
| $b = 24.0698 (13) \text{ \AA}$                                                                          | $\theta = 2.3\text{--}27.5^\circ$                                         |
| $c = 13.5639 (6) \text{ \AA}$                                                                           | $\mu = 0.80 \text{ mm}^{-1}$                                              |
| $\beta = 110.910 (2)^\circ$                                                                             | $T = 100 \text{ K}$                                                       |
| $V = 3454.8 (3) \text{ \AA}^3$                                                                          | <u>Fragment, light yellow</u>                                             |
| $Z = 2$                                                                                                 | <u>0.44 × 0.39 × 0.17 mm</u>                                              |
| $F(000) = 1296$                                                                                         |                                                                           |

### Data collection

|                                                                      |                                                                        |
|----------------------------------------------------------------------|------------------------------------------------------------------------|
| <u>Bruker Photon CMOS diffractometer</u>                             | <u>7623</u> independent reflections                                    |
| Radiation source: <u>IMS microsource</u>                             | <u>7048</u> reflections with $I > 2\sigma(I)$                          |
| <u>Helios optic monochromator</u>                                    | $R_{\text{int}} = 0.030$                                               |
| Detector resolution: <u>16 pixels mm<sup>-1</sup></u>                | $\theta_{\text{max}} = 27.1^\circ$ , $\theta_{\text{min}} = 2.2^\circ$ |
| <u>phi- and <math>\omega</math>-rotation scans</u>                   | $h = -14 \text{ } 14$                                                  |
| Absorption correction: <u>multi-scan SADABS 2014/5, Bruker, 2014</u> | $k = -30 \text{ } 30$                                                  |
| $T_{\text{min}} = 0.674$ , $T_{\text{max}} = 0.746$                  | $l = -14 \text{ } 17$                                                  |
| <u>139559</u> measured reflections                                   |                                                                        |

## Refinement

Refinement on  $F^2$

Least-squares matrix: full

$R[F^2 > 2\sigma(F^2)] = \underline{0.028}$

$wR(F^2) = \underline{0.071}$

$S = \underline{1.04}$

7623 reflections

416 parameters

165 restraints

0 constraints

Primary atom site location: intrinsic phasing

Secondary atom site location: difference Fourier map

Hydrogen site location: inferred from neighbouring sites

H-atom parameters constrained

$W = 1/[\Sigma^2(FO^2) + (0.031P)^2 + 2.6115P]$   
WHERE  $P = (FO^2 + 2FC^2)/3$

$(\Delta/\sigma)_{\max} = \underline{0.002}$

$\Delta\rho_{\max} = \underline{0.40} \text{ e } \text{\AA}^{-3}$

$\Delta\rho_{\min} = \underline{-0.39} \text{ e } \text{\AA}^{-3}$

Extinction correction: none

Extinction coefficient: -
